# Supplementary material for: Determining the presence of asthma-related molecules and salivary contamination in exhaled breath condensate
Source: Springer Nature journal article supplement (doi:10.1186/s12931-017-0538-5), 2017-04-12

**Additional file 7: Metabolite annotations and tandem MS fragmentation patterns of compound detected in EBC.** EBC was collected from four groups of volunteers: healthy smokers, healthy non-smokers, non-smokers with nasal congestion, and non-smokers with the common cold. Samples were pooled, lyophilized, reconstituted in 20µL of buffer, and analyzed using LC-MS based metabolomics. Metabolite peaks were extracted with Mass Hunter Profinder software (Agilent) using exact mass and isotope ratios. Tandem MS was performed, spectra was exported to NIST MS Search v2.2, and matched to the NIST14 Mass Spectral library. Fragments in red indicate EBC sample, fragments in blue indicate NIST standard reference spectra.

| Compound                                         | Smkr | Nasal | Cold | Hlthy | RT (mins) | Mass     | Formula        | Mode | NIST MF | NIST RMF | KEGG   | PubChem  |
|--------------------------------------------------|------|-------|------|-------|-----------|----------|----------------|------|---------|----------|--------|----------|
| (R)-4'-Deoxyindenesol                            | X    | X     | X    | X     | 6.620     | 250.1358 | C18 H18 O      | +    |         |          | C14541 | 11954028 |
| (R)-5-Deoxyindenesol                             | X    | X     | X    | X     | 7.839     | 250.1358 | C18 H18 O      | +    |         |          | C14543 | 11954030 |
| N-Acetyl-D-fucosamine                            | X    | X     | X    | X     | 8.079     | 205.0950 | C8 H15 N O5    | +    |         |          | C15480 | 11954186 |
| Heptadecatrienoic acid                           | X    | X     | X    | X     | 8.080     | 264.2089 | C17 H28 O2     | +    |         |          | C16344 | 16061034 |
| (+)-Prosopinine                                  | X    | X     | X    | X     | 10.422    | 313.2609 | C18 H35 N O3   | +    |         |          | C10167 | 442654   |
| 1,3-Dicyclohexylurea                             | X    | X     | X    | X     | 8.876     | 224.1889 | C13 H24 N2 O   | +    | 713     | 880      |        | 4277     |
| 10-Hydroxydecanoic acid                          | X    | X     | X    | X     | 7.523     | 216.1357 | C10 H20 O3     | -    |         |          | C02774 | 74300    |
| 11-Aminoundecanoic acid                          | X    | X     | X    | X     | 7.418     | 229.1680 | C11 H23 N O2   | -    |         |          |        | 17083    |
| 1-Hydroxy-2-naphthoic acid                       | X    | X     | X    | X     | 6.258     | 188.0472 | C11 H8 O3      | +    |         |          | C03203 | 6844     |
| 2-(Methylthiomethyl)-3-phenyl-2-propenal         | X    | X     | X    | X     | 6.388     | 230.0169 | C11 H12 O S    | +    |         |          |        | 6435634  |
| 2,4-Diamino-6-nitrotoluene                       | X    | X     | X    | X     | 7.112     | 167.0703 | C7 H9 N3 O2    | +    |         |          | C16396 | 96177    |
| 13,14-dihydro Prostaglandin F1a                  | X    | X     | X    | X     | 6.814     | 358.2736 | C20 H38 O5     | +    |         |          |        |          |
| 2-Anthramine                                     | X    | X     | X    | X     | 6.672     | 193.0897 | C14 H11 N      | +    |         |          | C14417 | 11937    |
| 2-Amino-3,7-dideoxy-D-threo-hept-6-ulosonic acid | X    | X     | X    | X     | 6.380     | 213.0620 | C7 H13 N O5    | +    |         |          | C16850 | 25137912 |
| 2-Carboxy-4-dodecanolide                         | X    | X     | X    | X     | 6.301     | 282.1449 | C13 H22 O4     | +    |         |          |        |          |
| 2-Methylisborneol                                | X    | X     | X    | X     | 10.458    | 185.1778 | C11 H20 O      | +    |         |          |        | 16913    |
| 4-Heptadecene                                    | X    | X     | X    | X     | 10.081    | 255.2924 | C17 H34        | +    |         |          |        |          |
| 3-Deoxyestrone                                   | X    | X     | X    | X     | 7.300     | 254.1676 | C18 H22 O      | +    |         |          | C14972 | 5882     |
| 4-Vinylcyclohexene                               | X    | X     | X    | X     | 7.491     | 233.2141 | C8 H12         | +    |         |          |        | 7499     |
| 5-Nitro-2-furfuryl methyl ether                  | X    | X     | X    | X     | 6.855     | 139.0270 | C6 H7 N O4     | -    |         |          | C14293 | 11469    |
| 9-(Methylthio)nonanenitrile                      | X    | X     | X    | X     | 6.799     | 185.1234 | C10 H19 N S    | +    |         |          |        | 93987    |
| Allotetrahydrocorticosterone                     | X    | X     | X    | X     | 6.756     | 351.2768 | C21 H34 O3     | +    |         |          | C13713 | 101771   |
| beta-Santonin                                    | X    | X     | X    | X     | 7.790     | 286.1171 | C15 H18 O3     | +    |         |          | C09545 | 237619   |
| Butocamide hydrogen succinate                    | X    | X     | X    | X     | 5.933     | 375.2285 | C16 H29 N O5   | -    |         |          | C12946 | 2486     |
| C14 sphingosine                                  | X    | X     | X    | X     | 9.628     | 271.2141 | C14 H29 N O2   | -    |         |          |        |          |
| Arachidonoyl-1-thio-Glycerol                     | X    | X     | X    | X     | 6.303     | 428.3085 | C23 H38 O3 S   | +    |         |          |        |          |
| cis-Hydroxy Perhexiline                          | X    | X     | X    | X     | 7.714     | 331.2304 | C19 H35 N O    | +    |         |          |        |          |
| Citronellyl formate                              | X    | X     | X    | X     | 8.918     | 184.1461 | C11 H20 O2     | -    |         |          | C12295 | 7778     |
| Diethylene glycol                                | X    | X     | X    | X     | 1.201     | 202.0454 | C4 H10 O3      | -    |         |          | C14689 | 8117     |
| Dimethyl suberate                                | X    | X     | X    | X     | 6.940     | 202.1207 | C10 H18 O4     | -    |         |          | C17803 | 15611    |
| Dizocilpine                                      | X    | X     | X    | X     | 7.245     | 221.1209 | C16 H15 N      | +    |         |          | C13737 | 1207     |
| Ethyl 3-(N-butylacetamido)propionate             | X    | X     | X    | X     | 6.857     | 215.1522 | C11 H21 N O3   | -    |         |          |        |          |
| Ethyl 3,4,5-trimethoxybenzoate                   | X    | X     | X    | X     | 6.664     | 219.1691 | C12 H16 O5     | +    |         |          |        | 231162   |
| Furmecyclo                                       | X    | X     | X    | X     | 13.492    | 251.1517 | C14 H21 N O3   | -    |         |          |        | 43359    |
| Enhydrin                                         | X    | X     | X    | X     | 7.002     | 464.1678 | C23 H28 O10    | -    |         |          | C09405 | 325606   |
| Ganoderic acid Mg                                | X    | X     | X    | X     | 6.451     | 602.3877 | C35 H54 O8     | +    |         |          |        |          |
| Gnididilatin                                     | X    | X     | X    | X     | 7.590     | 669.3502 | C37 H48 O10    | +    |         |          | C09101 | 442032   |
| Gomphrenin-I                                     | X    | X     | X    | X     | 11.228    | 646.1258 | C24 H26 N2 O13 | -    |         |          | C08544 | 4480887  |
| Gossypetin 3,5,8,3',4'-pentamethyl ether         | X    | X     | X    | X     | 0.979     | 388.1127 | C20 H20 O8     | +    |         |          |        |          |
| Heptanal                                         | X    | X     | X    | X     | 6.502     | 210.0870 | C7 H14 O       | -    |         |          | C14390 | 8130     |
| Icosenoic acid                                   | X    | X     | X    | X     | 13.666    | 327.3138 | C20 H38 O2     | +    |         |          | C16526 | 5282768  |
| Indicumenone                                     | X    | X     | X    | X     | 12.421    | 234.1620 | C15 H24 O3     | -    |         |          | C17612 |          |
| 12,14-Pentacosadienoic acid                      | X    | X     | X    | X     | 6.122     | 374.3185 | C25 H42 O2     | -    |         |          |        | 9543642  |
| Isodictamnine                                    | X    | X     | X    | X     | 6.491     | 199.0637 | C12 H9 N O2    | +    |         |          | C10697 | 442913   |
| N-cis-tetradec-9Z-enoyl-L-Homoserine lactone     | X    | X     | X    | X     | 10.715    | 309.2301 | C18 H31 N O3   | +    |         |          |        |          |
| Oxprenolol                                       | X    | X     | X    | X     | 8.085     | 265.1652 | C15 H23 N O3   | -    |         |          |        | 4631     |
| Pantothenol                                      | X    | X     | X    | X     | 6.088     | 187.1208 | C9 H19 N O4    | -    |         |          | C05944 | 4678     |
| p-Cymene                                         | X    | X     | X    | X     | 9.382     | 152.1205 | C10 H14        | +    |         |          | C06575 | 7463     |
| Pulcherriminic acid                              | X    | X     | X    | X     | 6.774     | 238.1332 | C12 H20 N2 O4  | -    |         |          |        | 3083664  |
| Tamarixetin                                      | X    | X     | X    | X     | 6.420     | 298.0486 | C16 H12 O7     | -    |         |          | C10188 | 482576   |
| Teniposide                                       | X    | X     | X    | X     | 11.221    | 656.1547 | C32 H32 O13 S  | -    |         |          | C11153 | 5396     |
| Tremetone                                        | X    | X     | X    | X     | 1.200     | 264.0154 | C13 H14 O2     | -    |         |          | C08992 | 78673    |
| Ureidoglycine                                    | X    | X     | X    | X     | 0.980     | 380.0903 | C3 H7 N3 O3    | -    |         |          | C02091 | 503      |
| Zeatin                                           | X    | X     | X    | X     | 7.333     | 219.1122 | C10 H13 N5 O   | +    |         |          | C00371 | 15419    |
| 3-Cyano-6-methoxycoumarin                        | X    |       |      |       | 5.936     | 201.0426 | C11 H7 N O3    | +    | 508     | 970      |        |          |

|                                                               |   |   |   |   |        |          |                 |   |     |     |        |          |
|---------------------------------------------------------------|---|---|---|---|--------|----------|-----------------|---|-----|-----|--------|----------|
| 1,2-Dimethylimidazole                                         | X |   |   |   | 1.538  | 96.0687  | C5 H8 N2        | + | 520 | 987 |        | 15617    |
| 1-Hexadecylamine                                              | X |   |   |   | 9.087  | 241.277  | C16 H35 N       | + | 398 | 858 |        | 8926     |
| 2,6-Di-tert-butyl-4-hydroxymethylphenol                       | X |   |   |   | 6.806  | 236.1776 | C15 H24 O2      | + | 823 | 922 |        | 6929     |
| 2-Aminobenzamide                                              | X |   |   |   | 1.58   | 136.0637 | C7 H8 N2 O      | + | 425 | 977 |        | 6942     |
| 2-Amino-m-cresol                                              | X |   |   |   | 0.811  | 123.0684 | C7 H9 N O       | + | 560 | 999 |        | 3014138  |
| 3-Methylhistidine                                             | X |   |   |   | 0.809  | 169.0851 | C7 H11 N3 O2    | + | 383 | 860 | C01152 | 64969    |
| Arginine                                                      | X |   |   |   | 0.81   | 174.1117 | C6 H14 N4 O2    | + | 610 | 908 | C02385 | 232      |
| Carnosine                                                     | X |   |   |   | 0.809  | 226.1066 | C9 H14 N4 O3    | + | 262 | 841 | C00386 | 9369     |
| p,p'-Ditolylamine                                             | X |   |   |   | 6.038  | 197.1204 | C14 H15 N       | + | 597 | 933 |        | 69293    |
| Tryptophan                                                    | X |   |   |   | 4.079  | 204.0899 | C11 H12 N2 O2   | + | 679 | 926 |        |          |
| 4-Hydroxy-3-methoxyphenethyl alcohol                          | X |   |   |   | 5.255  | 166.063  | C9 H12 O3       | + | 560 | 999 |        | 16928    |
| 4-Imidazoleacrylic acid                                       | X |   |   |   | 5.023  | 138.0429 | C6 H6 N2 O2     | + | 557 | 998 |        | 1178     |
| 5-Aminosalicylic acid                                         | X |   |   |   | 1.612  | 153.0426 | C7 H7 N O3      | + | 553 | 997 |        | 4075     |
| D-erythro-Sphinganine                                         | X |   |   |   | 5.186  | 301.2981 | C18 H39 N O2    | + | 51  | 299 |        | 91486    |
| Triethyl citrate                                              | X |   |   |   | 7.519  | 276.1209 | C12 H20 O7      | + | 360 | 945 |        | 6506     |
| Acetylgarginine                                               | X |   |   |   | 4.91   | 216.1222 | C8 H16 N4 O3    | + | 404 | 910 |        |          |
| 5-Methoxytryptophan                                           | X |   |   |   | 6.124  | 234.1004 | C12 H14 N2 O3   | + | 532 | 993 |        | 119802   |
| 1,2-Benzenecarboxylic acid                                    | X |   | X | X | 12.835 | 148.016  | C8 H4 O3        | + | 679 | 946 |        | 181977   |
| 2-Butyl-4-propylthiazole                                      | X |   | X | X | 7.548  | 205.0902 | C10 H17 N S     | + |     |     |        |          |
| 3-Hydroxymorphinan                                            | X |   |   | X | 5.004  | 243.1623 | C16 H21 N O     | + | 535 | 989 |        |          |
| Gabaculine                                                    | X |   | X | X | 6.387  | 121.0524 | C7 H9 N O2      | - |     |     | C12110 | 3445     |
| Thyrotropin releasing hormone                                 | X |   | X |   | 9.248  | 362.1702 | C16 H22 N6 O4   | - |     |     | C03958 | 4968     |
| 12-Nitrolinoic acid                                           | X | X | X |   | 6.303  | 325.2245 | C18 H31 N O4    | + |     |     |        |          |
| 12-O-Palmitoyl-16-hydroxyphorbol 13-acetate                   | X | X |   |   | 5.803  | 756.4039 | C38 H60 O9      | - |     |     | C09153 | 124127   |
| 15(S)-HPETE                                                   | X | X |   | X | 10.185 | 264.2089 | C20 H32 O4      | + |     |     | C05966 | 1440     |
| 2-chloro-2-iodoacetamide                                      | X | X | X |   | 8.499  | 278.9149 | C2 H3Cl I N O   | - |     |     |        |          |
| 2-Oxo-4-hydroxy-5-aminovalerate                               | X | X |   |   | 1.604  | 129.0426 | C5 H9 N O4      | - |     |     | C05941 | 440852   |
| 2-Oxo-6-methylthiohexanoic acid                               | X | X |   | X | 8.085  | 193.0780 | C7 H12 O3 S     | + |     |     | C17216 | 44237195 |
| 2S-Amino-tridecanoic acid                                     | X | X |   | X | 8.835  | 257.1986 | C13 H27 N O2    | + |     |     | C13795 | 656741   |
| 3,4-Dihydrocadalene                                           | X | X | X |   | 10.501 | 200.1563 | C15 H20         | + |     |     |        |          |
| 3-Hydroxy-2-(4-morpholinylmethyl)estra-1,3,5(10)-trien-17-one | X | X |   |   | 5.178  | 431.1463 | C23 H31 N O3    | - |     |     | C14926 | 235463   |
| 6-hydroxy caproic acid                                        | X | X | X |   | 6.131  | 174.0890 | C6 H12 O3       | - |     |     |        | 14490    |
| 6-Hydroxy-3,7-dimethyloctanoate                               | X | X |   | X | 8.518  | 188.1410 | C10 H20 O3      | - |     |     | C18067 |          |
| Bisdiphosphoinositol tetrakisphosphate                        | X | X | X |   | 0.771  | 705.8145 | C6 H20 O24 P8   | - |     |     |        | 25245165 |
| Carteolol                                                     | X | X | X |   | 6.385  | 274.1687 | C16 H24 N2 O3   | - |     |     | C06874 | 2583     |
| Chalcogran                                                    | X | X |   |   | 6.409  | 156.1151 | C9 H16 O2       | - |     |     | C08471 | 441558   |
| Cybutryne                                                     | X | X | X |   | 2.275  | 281.1293 | C11 H19 N5 S    | - |     |     |        | 91590    |
| Deaminohydroxyblasticidin S                                   | X | X |   |   | 5.769  | 483.2076 | C17 H25 N7 O6   | - |     |     | C03860 | 629      |
| Homoserine                                                    | X | X | X |   | 6.707  | 215.0406 | C4 H9 N O3      | - |     |     |        | 779      |
| Dodecanedioic acid                                            | X | X | X |   | 8.186  | 230.1517 | C12 H22 O4      | - |     |     | C02678 | 12736    |
| Eleganin                                                      | X | X | X |   | 7.474  | 434.1566 | C22 H26 O9      | - |     |     | C09401 | 5281440  |
| Ethirimol                                                     | X | X |   |   | 6.063  | 532.2984 | C11 H19 N3 O    | - |     |     |        | 32152    |
| gamma-Chaconine                                               | X | X | X |   | 6.247  | 601.3965 | C33 H53 N O6    | - |     |     |        | 160496   |
| Hallactone B                                                  | X | X | X |   | 9.784  | 468.1098 | C20 H24 O9 S    | - |     |     | C09105 | 442036   |
| Hydnocarpic acid                                              | X | X | X |   | 9.749  | 252.2089 | C16 H28 O2      | + |     |     | C16795 | 110680   |
| Levan                                                         | X | X | X |   | 1.016  | 504.1672 | C18 H32 O16     | - |     |     | C06215 | 440946   |
| Lys Lys Gly                                                   | X | X | X |   | 5.934  | 377.2258 | C14 H29 N5 O4   | - |     |     |        |          |
| Met Trp Glu                                                   | X | X |   |   | 10.589 | 492.1678 | C21 H28 N4 O6 S | - |     |     |        |          |
| Meteloidine                                                   | X | X |   |   | 5.385  | 315.1683 | C13 H21 N O4    | - |     |     | C10861 | 443006   |
| N-Acetylleucine                                               | X | X |   |   | 5.710  | 173.1055 | C8 H15 N O3     | - |     |     |        | 1995     |
| N-Methylpelletierine                                          | X | X | X |   | 6.429  | 201.1364 | C9 H17 N O      | - |     |     | C06184 | 86786    |
| PA(22:2/0:0)                                                  | X | X | X |   | 6.118  | 490.3105 | C25 H47 O7 P    | - |     |     |        |          |
| Pachymic acid                                                 | X | X |   |   | 5.487  | 642.3713 | C33 H52 O5      | - |     |     | C17044 | 316448   |
| Paromamine                                                    | X | X | X |   | 5.176  | 369.1758 | C12 H25 N3 O7   | - |     |     | C01743 | 439560   |
| PI(12:0/12:0)                                                 | X | X | X |   | 5.703  | 698.3983 | C33 H63 O13 P   | - |     |     |        |          |
| Tetrahydrodipicolinate                                        | X | X | X |   | 7.780  | 153.0427 | C7 H9 N O4      | - |     |     |        | 5460758  |
| Threonine                                                     | X | X | X |   | 8.939  | 233.0513 | C4 H9 N O3      | - |     |     |        | 205      |
| 1,8-Diazacyclotetradecane-2,9-dione                           |   | X | X |   | 6.118  | 498.3410 | C12 H22 N2 O2   | - |     |     | C04277 | 16       |
| 13,14-dihydroxy-docosanoic acid                               |   | X | X |   | 10.059 | 394.3109 | C22 H44 O4      | + |     |     |        | 102450   |
| (R,S)-Tetrahydrobenzylisoquinoline                            |   | X | X | X | 7.463  | 223.1366 | C16 H17 N       | + |     |     | C05201 | 98468    |
| 2-Methylpropanal oxime                                        |   | X | X | X | 6.879  | 87.0683  | C4 H9 N O       | + |     |     | C03219 | 5324281  |
| 3-Hydroxy-4-methoxybenzyl alcohol                             |   | X |   | X | 5.078  | 154.063  | C8 H10 O3       | + | 479 | 804 |        | 78089    |
| 3-Oxosteroid                                                  |   | X | X | X | 8.419  | 291.2562 | C19 H30 O       | + |     |     | C01876 | 439594   |

|                                                  |  |   |   |   |        |          |                |   |     |     |        |         |
|--------------------------------------------------|--|---|---|---|--------|----------|----------------|---|-----|-----|--------|---------|
| 4-Dodecylphenol                                  |  | X | X | X | 11.465 | 279.2561 | C18 H30 O      | + |     |     | C14245 | 66030   |
| 5-(1-oxopropan-2-yl)isolongifol-5-ene            |  | X | X | X | 11.149 | 260.2132 | C18 H28 O      | + |     |     |        |         |
| 6-(2-Chloroallylthio)purine                      |  | X | X |   | 7.239  | 247.9896 | C8 H7 Cl N4 S  | + |     |     | C15397 | 3247797 |
| Aniracetam                                       |  | X | X | X | 8.231  | 201.0790 | C12 H13 N O3   | - |     |     | C13355 | 2196    |
| Benzylamine                                      |  | X |   |   | 8.278  | 107.0735 | C7 H9 N        | + | 539 | 983 | C15562 | 7504    |
| 1 $\alpha$ ,24,25,28-tetrahydroxyvitamin D2      |  | X | X |   | 6.213  | 460.3189 | C28 H44 O5     | - |     |     |        |         |
| MG(18:1)                                         |  | X | X | X | 8.908  | 373.3185 | C21 H40 O4     | + |     |     |        |         |
| Miotine                                          |  | X | X | X | 6.023  | 222.1369 | C12 H18 N2 O2  | + |     |     | C11763 | 46092   |
| O-decanoyl-R-carnitine                           |  | X | X |   | 6.305  | 361.2453 | C17 H33 N O4   | - |     |     |        |         |
| Palmitoylglycine                                 |  | X |   | X | 9.931  | 335.2469 | C18 H35 N O3   | + |     |     |        | 151008  |
| PC(18:1/22:6)                                    |  | X | X | X | 6.813  | 831.5785 | C48 H82 N O8 P | + |     |     |        |         |
| PG(18:4/20:4)                                    |  | X | X | X | 12.183 | 790.4734 | C44 H71 O10 P  | + |     |     |        |         |
| Purine                                           |  | X |   |   | 8.811  | 120.0436 | C5 H4 N4       | + | 791 | 993 | C15587 | 1044    |
| S-(4,5-Dihydro-2-methyl-3-furanyl) ethanethioate |  | X | X | X | 5.915  | 186.0353 | C7 H10 O2 S    | - |     |     |        | 5463955 |
| Tris(2-butoxyethyl)phosphate                     |  | X | X | X | 12.185 | 398.2433 | C18 H39 O7 P   | + | 829 | 922 | C14446 | 6540    |
| 3-Acetyl-8-methoxycoumarin                       |  |   | X |   | 5.846  | 218.0579 | C12 H10 O4     | + | 661 | 881 |        |         |
| 1-(2-Pyrimidyl)piperazine                        |  |   |   | X | 5.37   | 164.1062 | C8 H12 N4      | + | 559 | 998 |        | 88747   |
| 1-Butylimidazole                                 |  |   | X |   | 4.977  | 124.1    | C7 H12 N2      | + | 449 | 852 |        | 61347   |
| 2-Hydroxy-6'-methoxyacetophenone                 |  |   |   | X | 10.183 | 166.063  | C9 H10 O3      | + | 153 | 601 |        | 69709   |
| 4-(4-Aminophenoxy)aniline                        |  |   |   | X | 5.892  | 200.095  | C12 H12 N2 O   | + | 454 | 893 |        |         |
| 6-Hydroxymelatonin                               |  |   |   | X | 1.184  | 248.1161 | C13 H16 N2 O3  | + | 422 | 890 | C05643 | 1864    |
| Atractyloside C                                  |  |   | X | X | 13.415 | 442.2598 | C21 H36 O7     | - |     |     |        |         |
| Benzofuran                                       |  |   | X | X | 7.921  | 118.0419 | C8 H6 O        | + |     |     | C14512 | 9223    |
| $\alpha$ -Lipoic acid                            |  |   | X |   | 5.666  | 206.0435 | C8 H14 O2 S2   | + | 476 | 775 | C00725 | 864     |
| Ephedrine                                        |  |   | X |   | 31.317 | 165.1154 | C10 H15 N O    | + | 560 | 999 | C01575 | 5032    |
| Hexaethylene glycol                              |  |   | X |   | 5.443  | 282.1679 | C12 H26 O7     | + | 765 | 949 |        | 17472   |
| Arogenate                                        |  |   | X | X | 6.828  | 227.0775 | C10 H13 N O5   | - |     |     |        | 193887  |
| Tetradecylamine                                  |  |   | X |   | 7.876  | 213.2456 | C14 H31 N      | + | 522 | 957 |        |         |

### EBC from healthy non-smokers

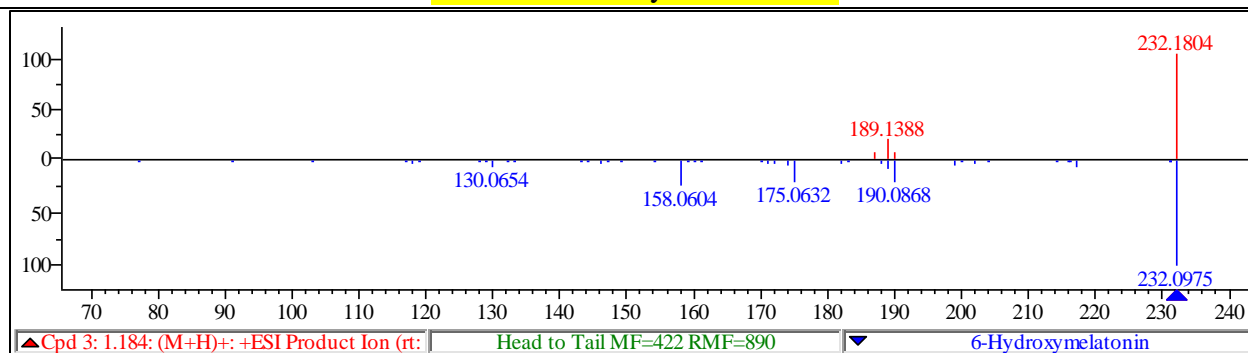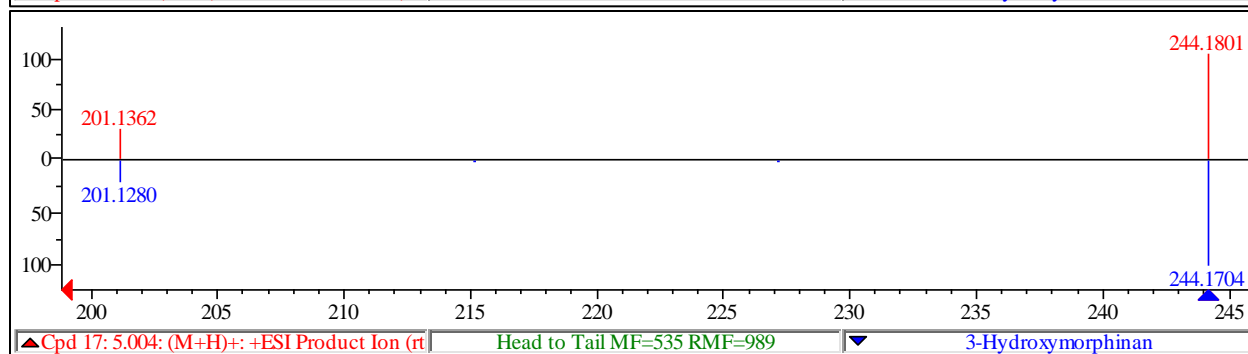

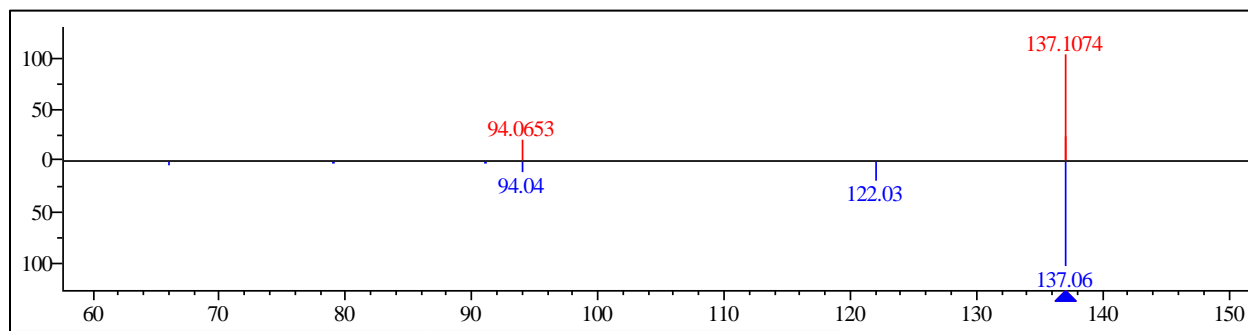

▲ Cpd 21: 5.072: (M+H)+: +ESI Product Ion (t) | Head to Tail MF=413 RMF=928 | ▼ 3-Hydroxy-4-methoxybenzyl alcohol

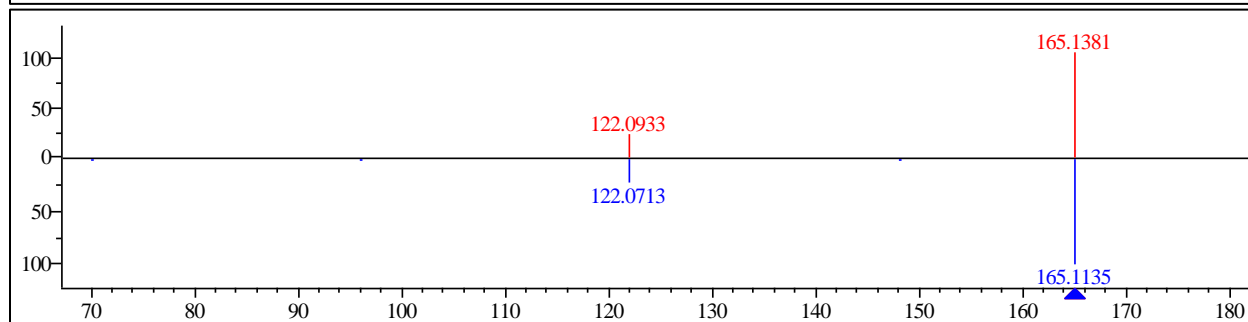

▲ Cpd 71: 5.370: (M+H)+: +ESI Product Ion (rt) | Head to Tail MF=559 RMF=998 | ▼ 1-(2-Pyrimidinyl)piperazine

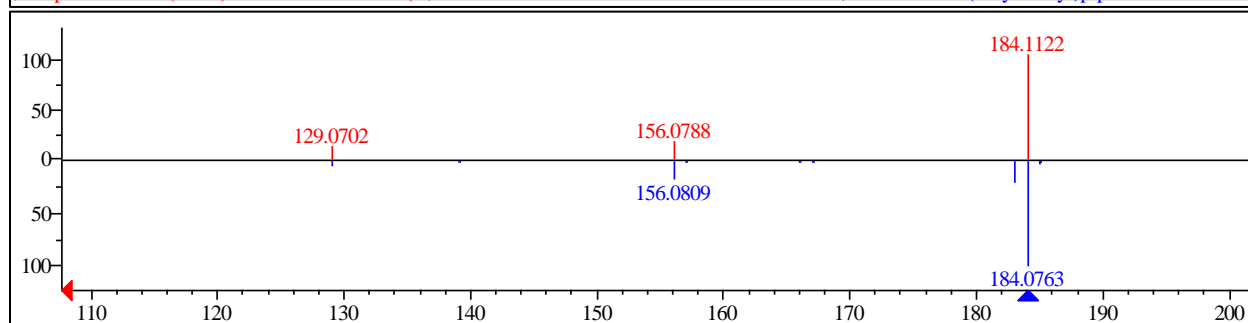

▲ Cpd 125: 5.892: (M+H)+: +ESI Product Ion (t) | Head to Tail MF=454 RMF=893 | ▼ 4-(4-Aminophenoxy)aniline

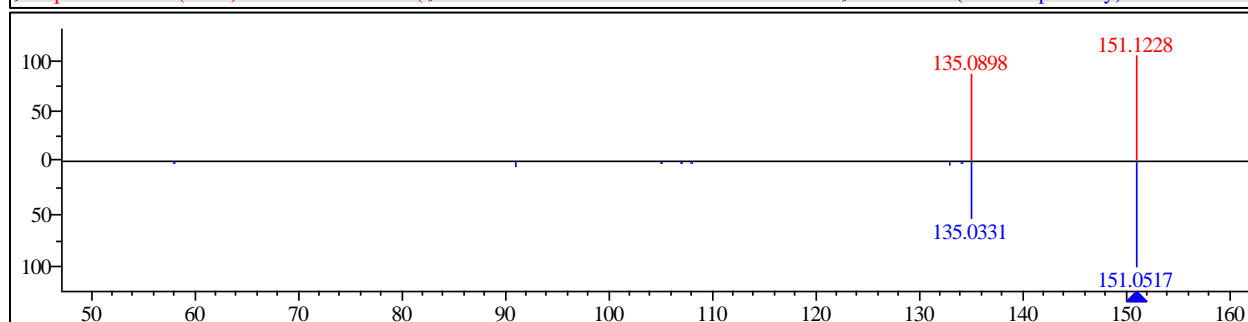

▲ Cpd 2: 5.182: +ESI Product Ion (rt: 5.138 min) | Head to Tail MF=527 RMF=993 | ▼ 2-Aminobenzenecarbohydroxamic acid

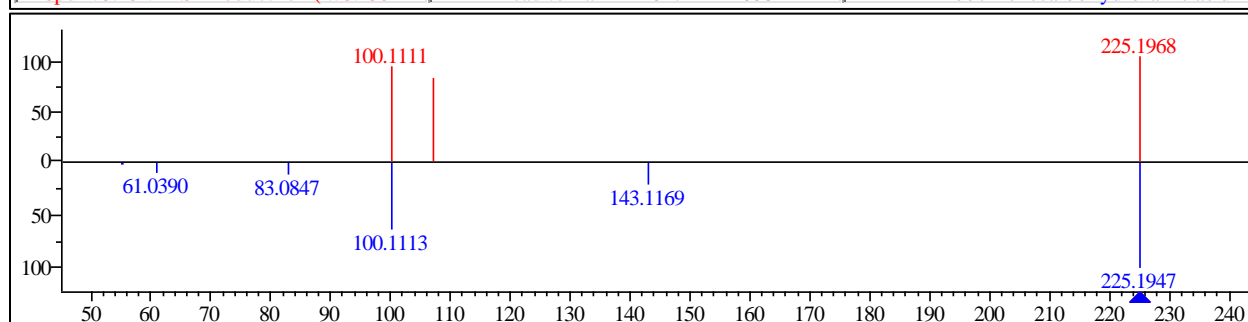

▲ Cpd 362: 8.876: (M+H)+: +ESI Product Ion (t) | Head to Tail MF=473 RMF=789 | ▼ 1,3-Dicyclohexylurea

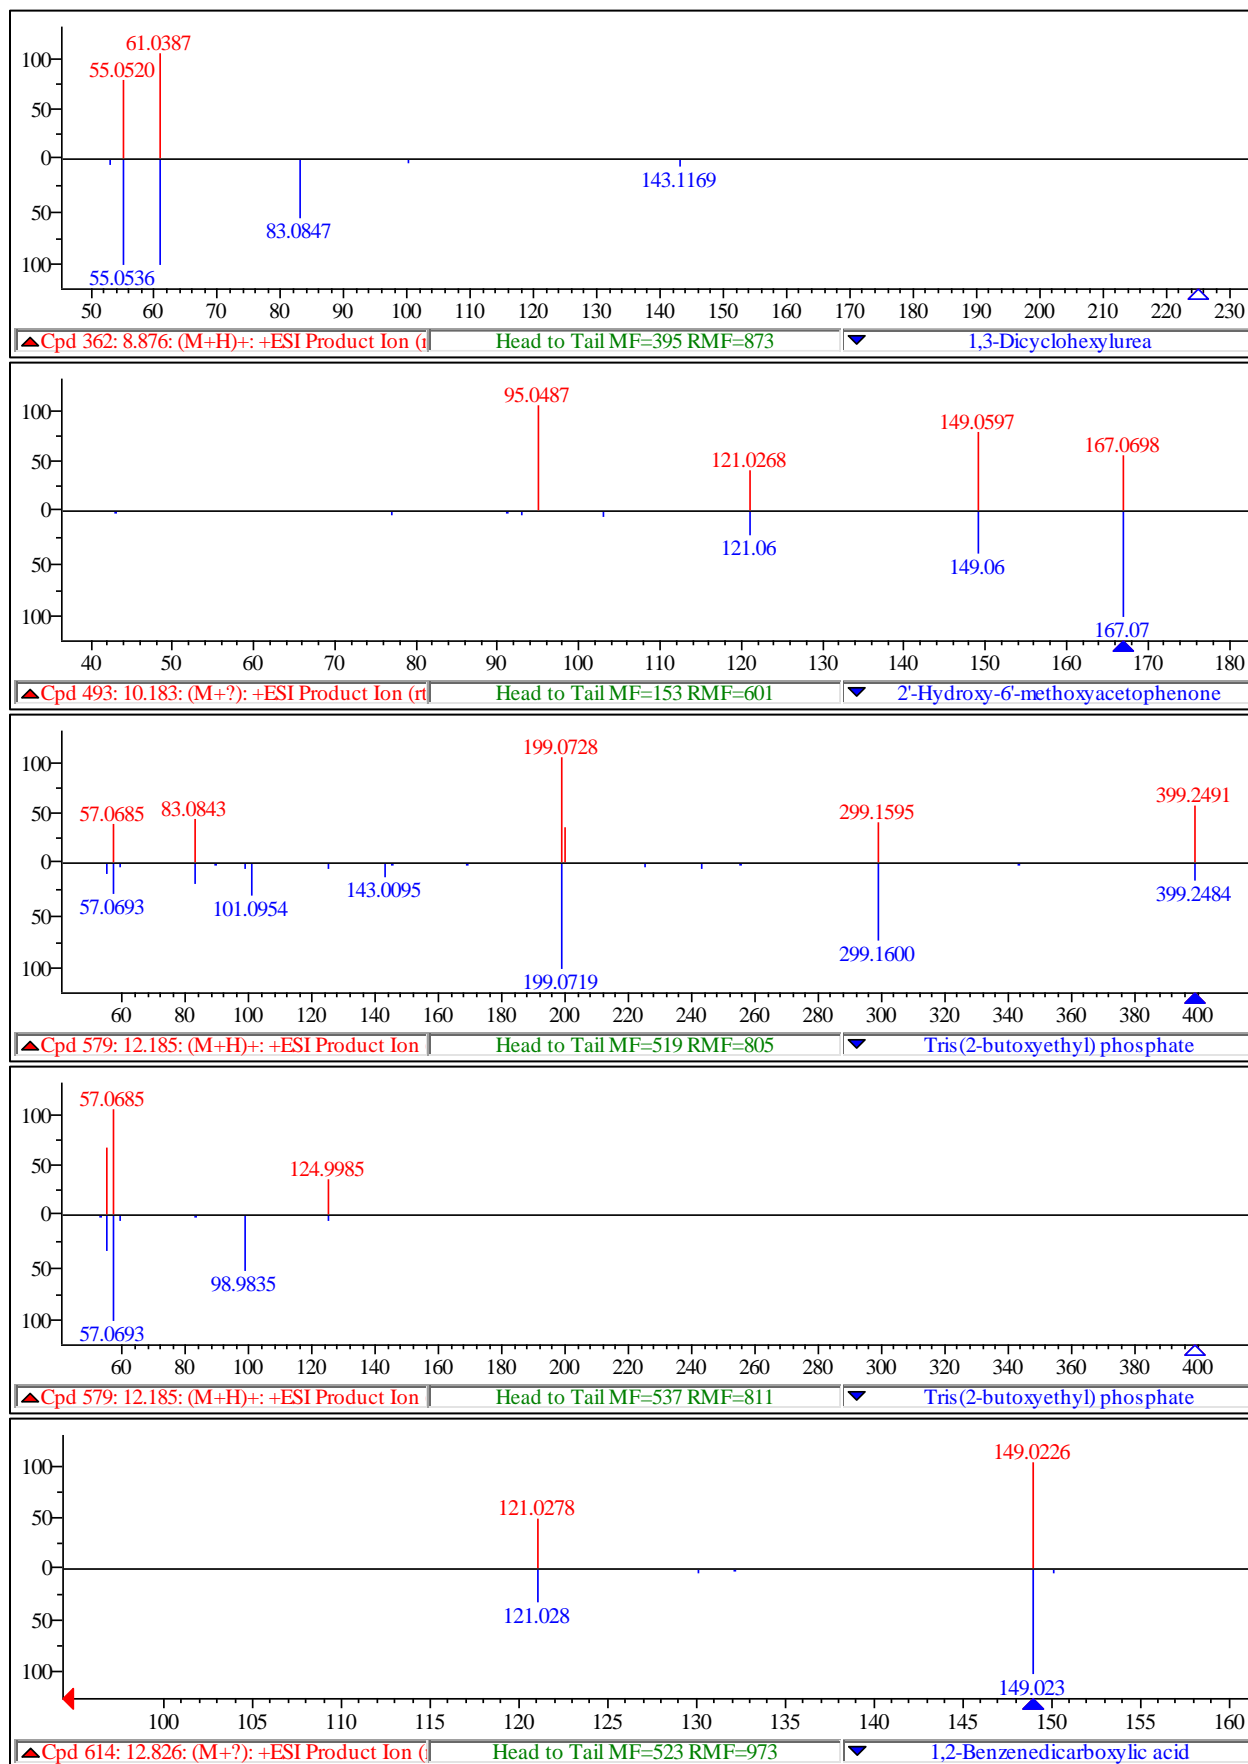

EBC from non-smokers with the common cold

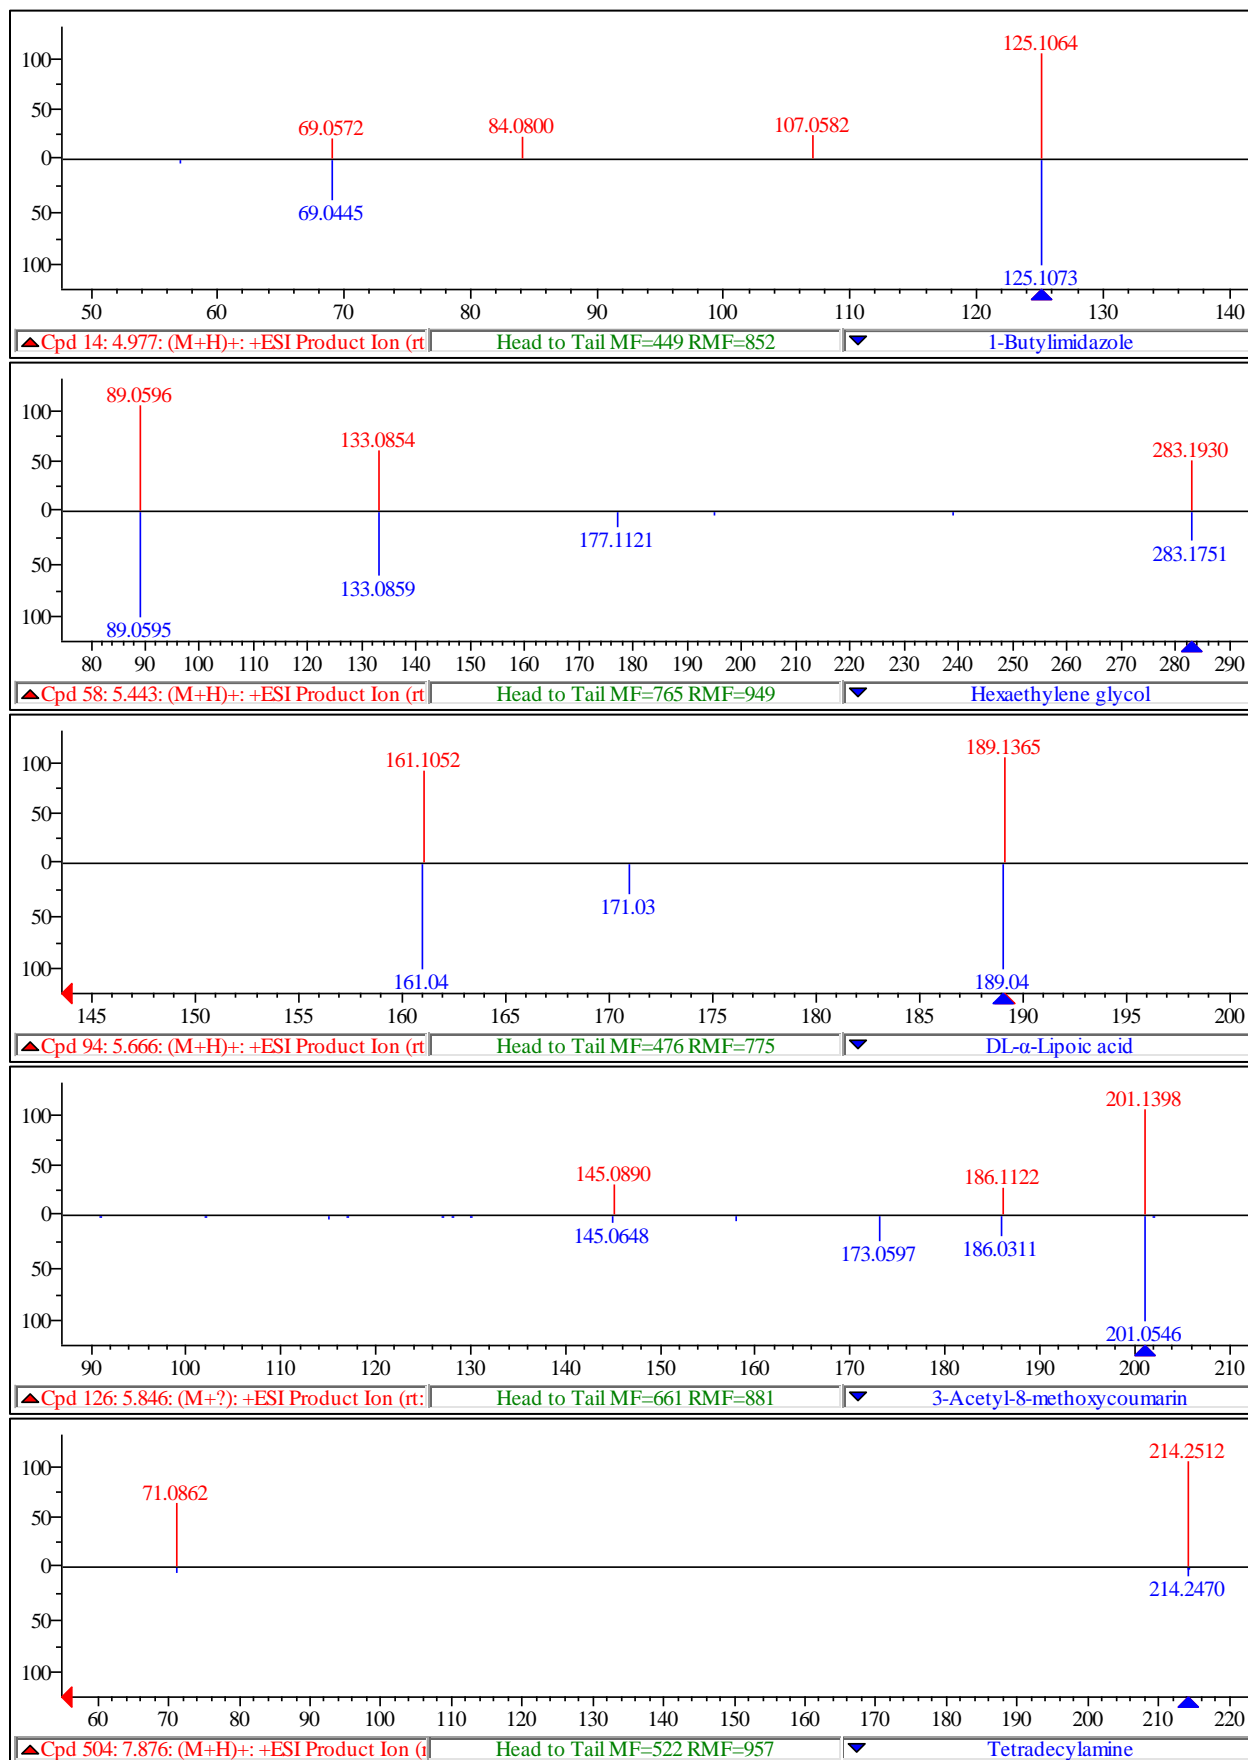

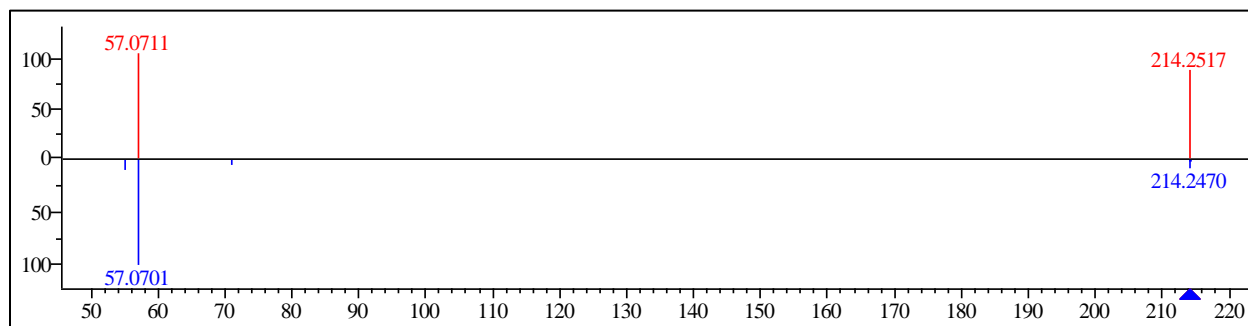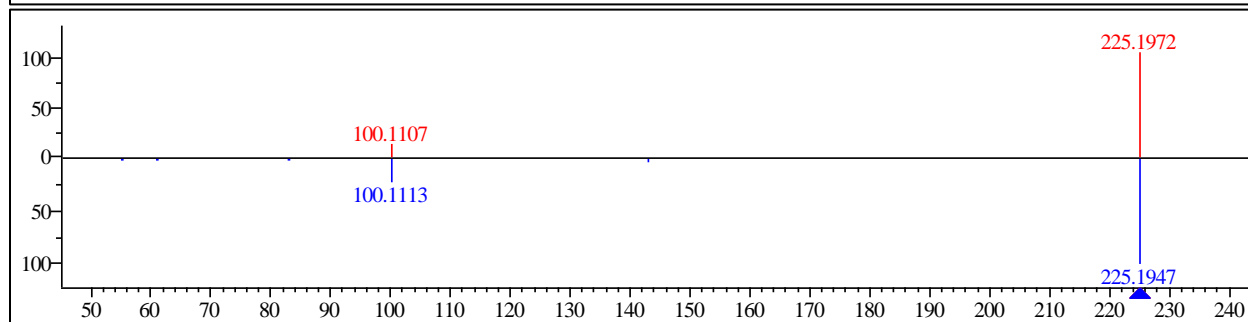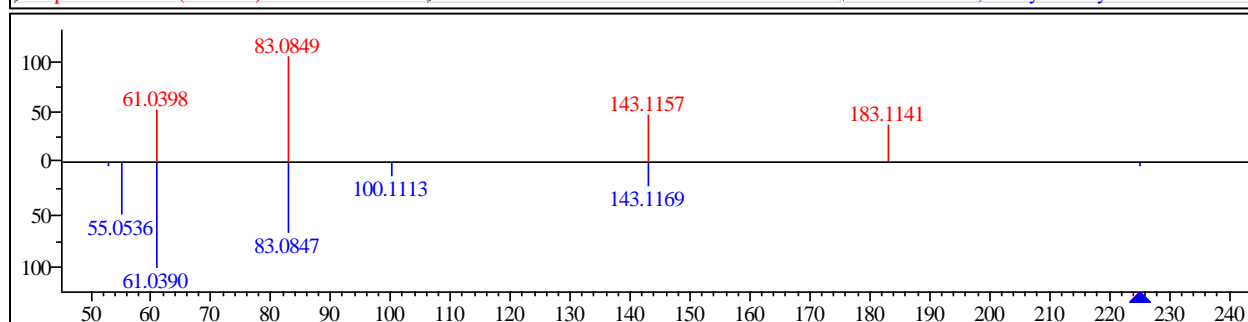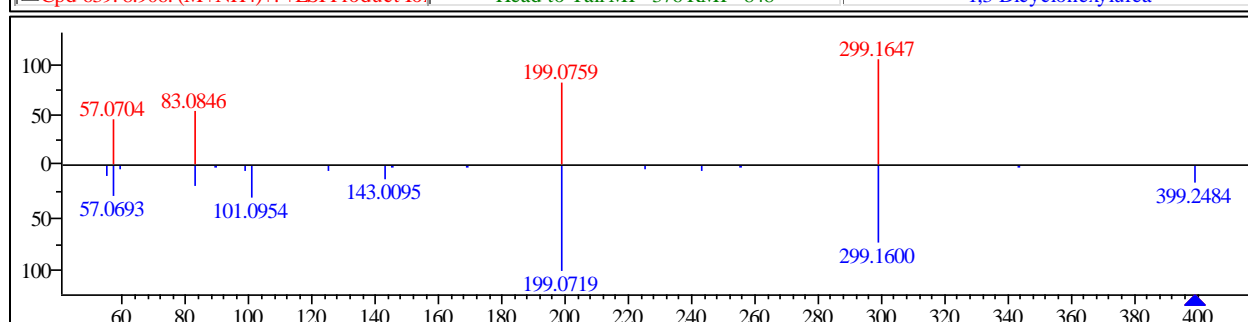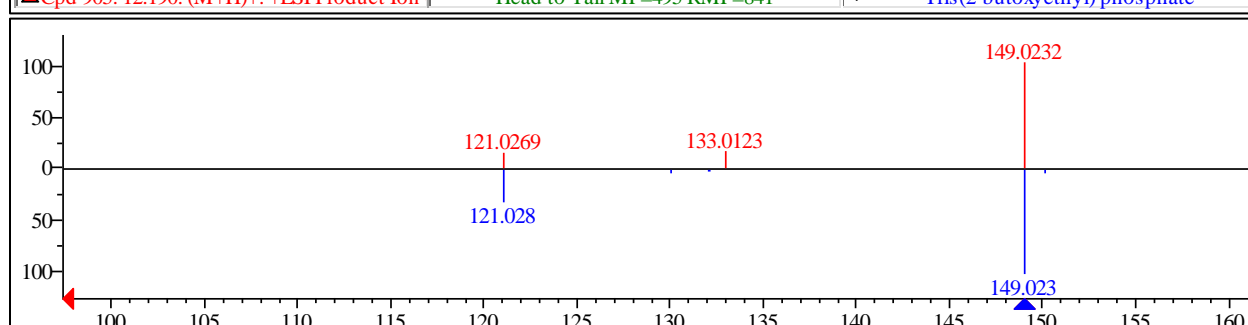

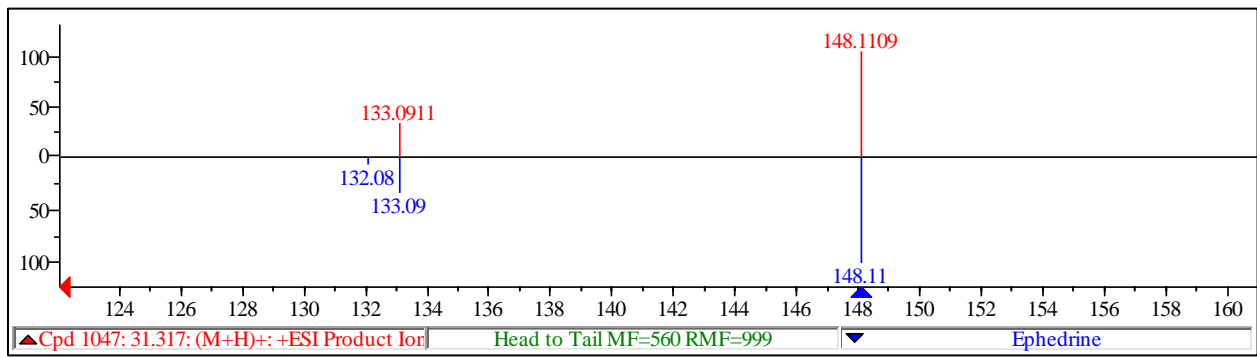

EBC from non-smokers with nasal congestion

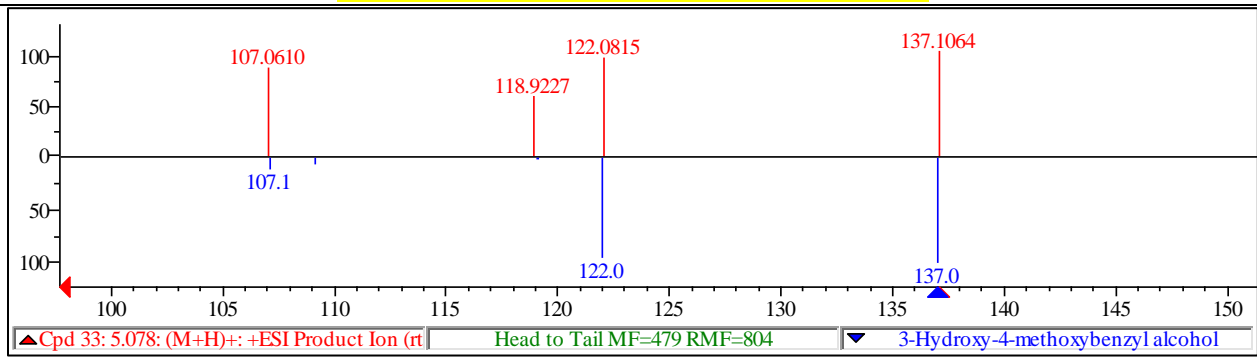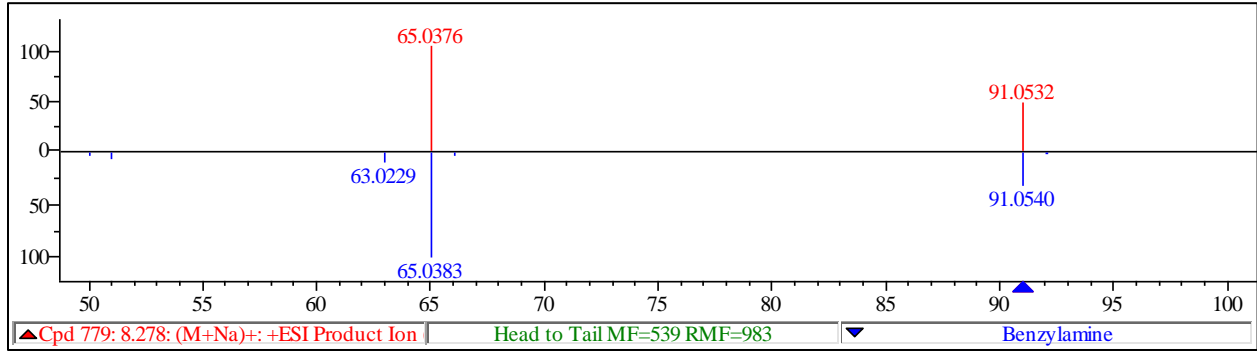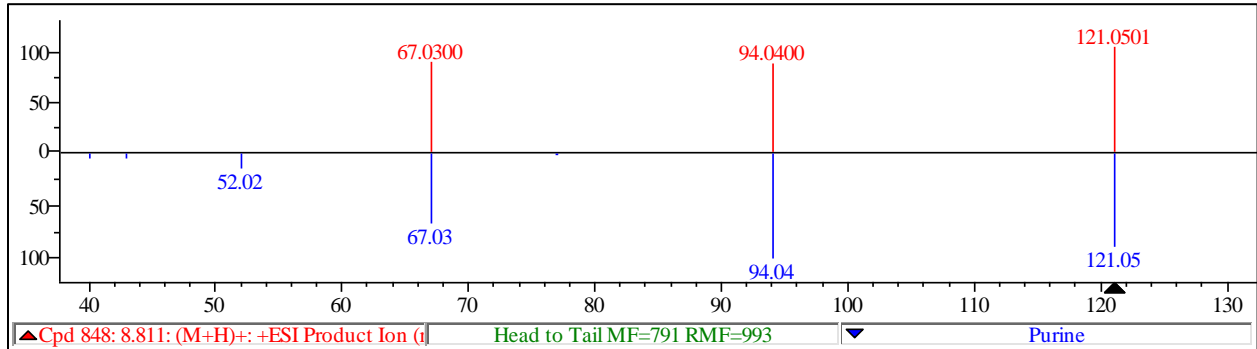



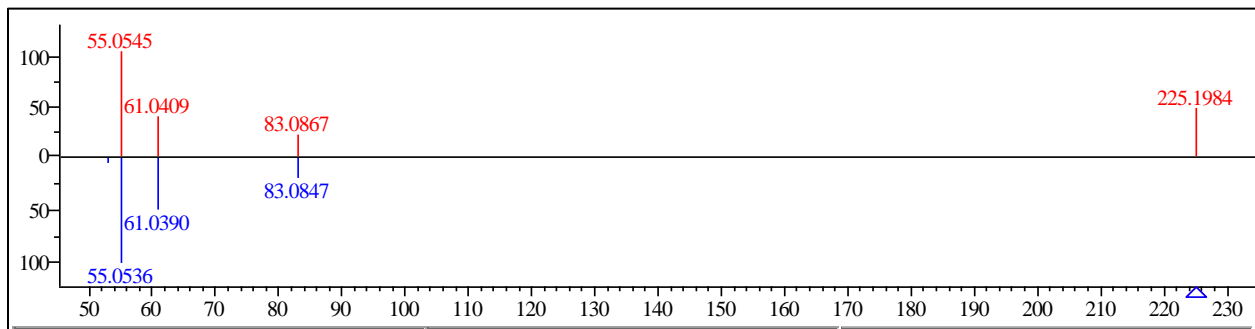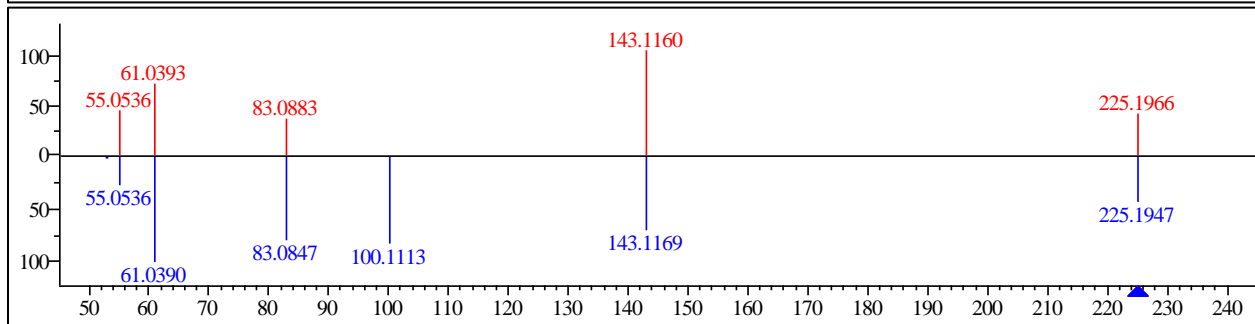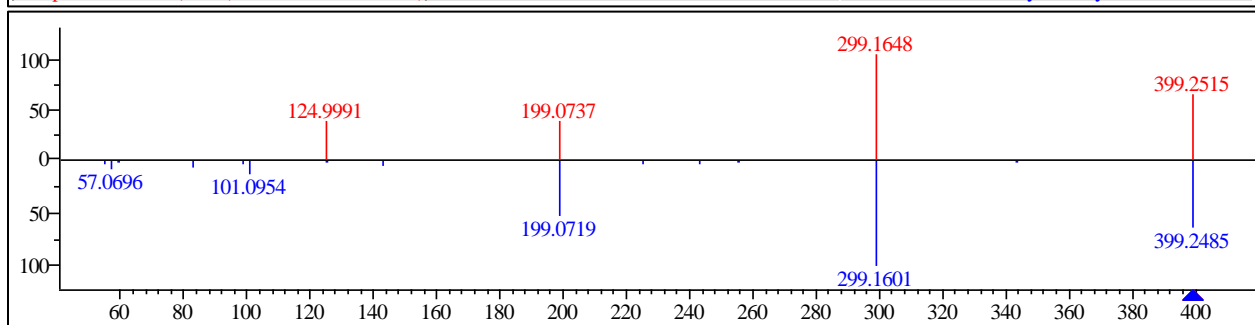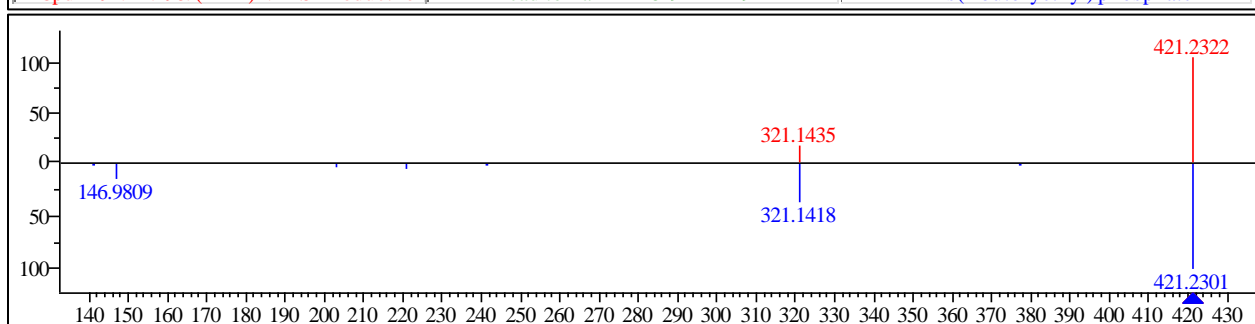

**EBC from healthy non-smokers**

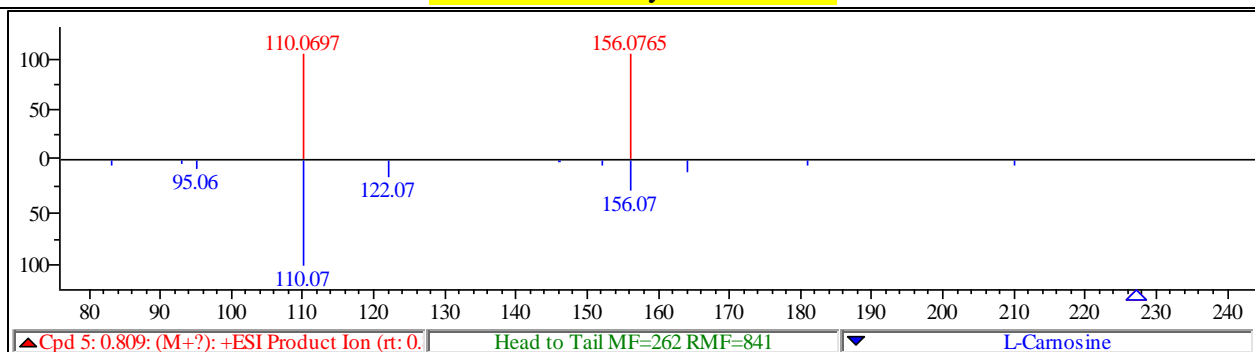

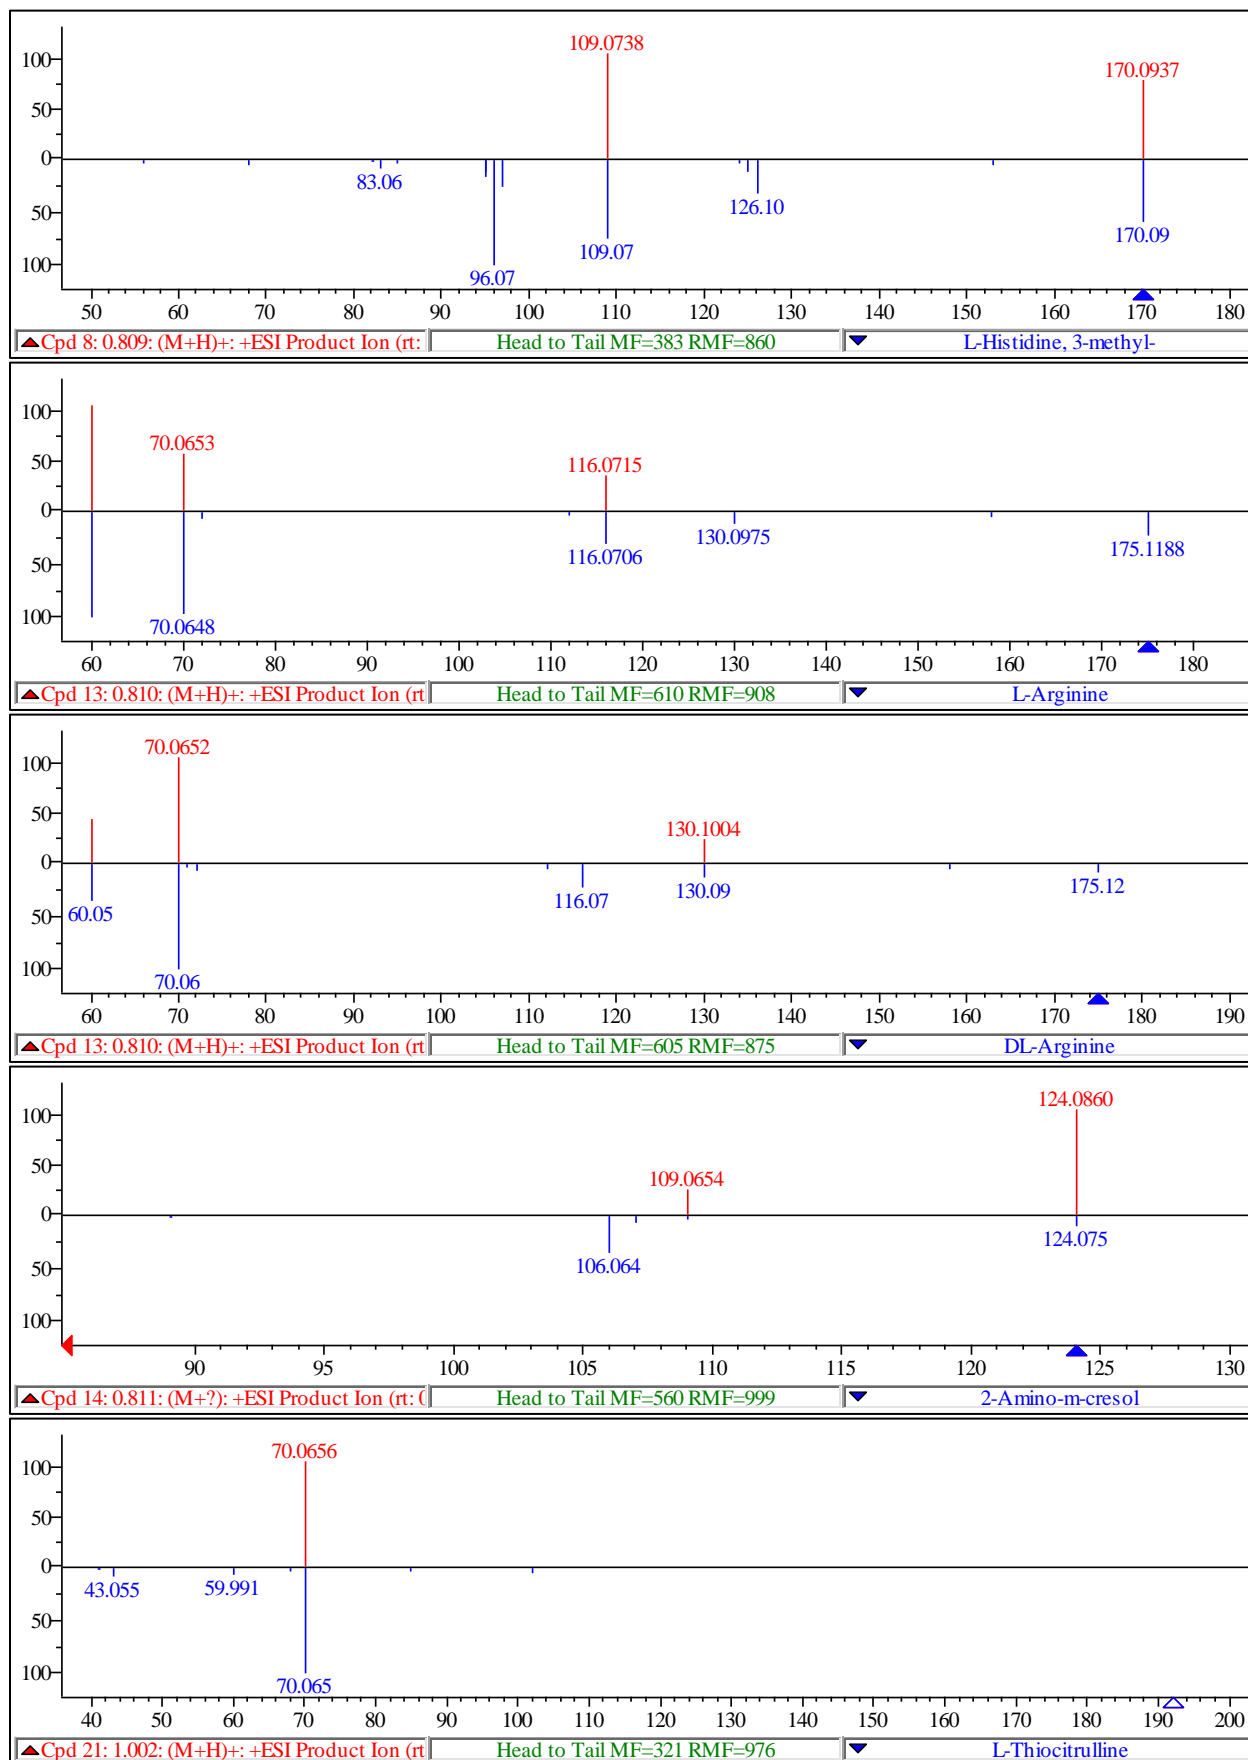

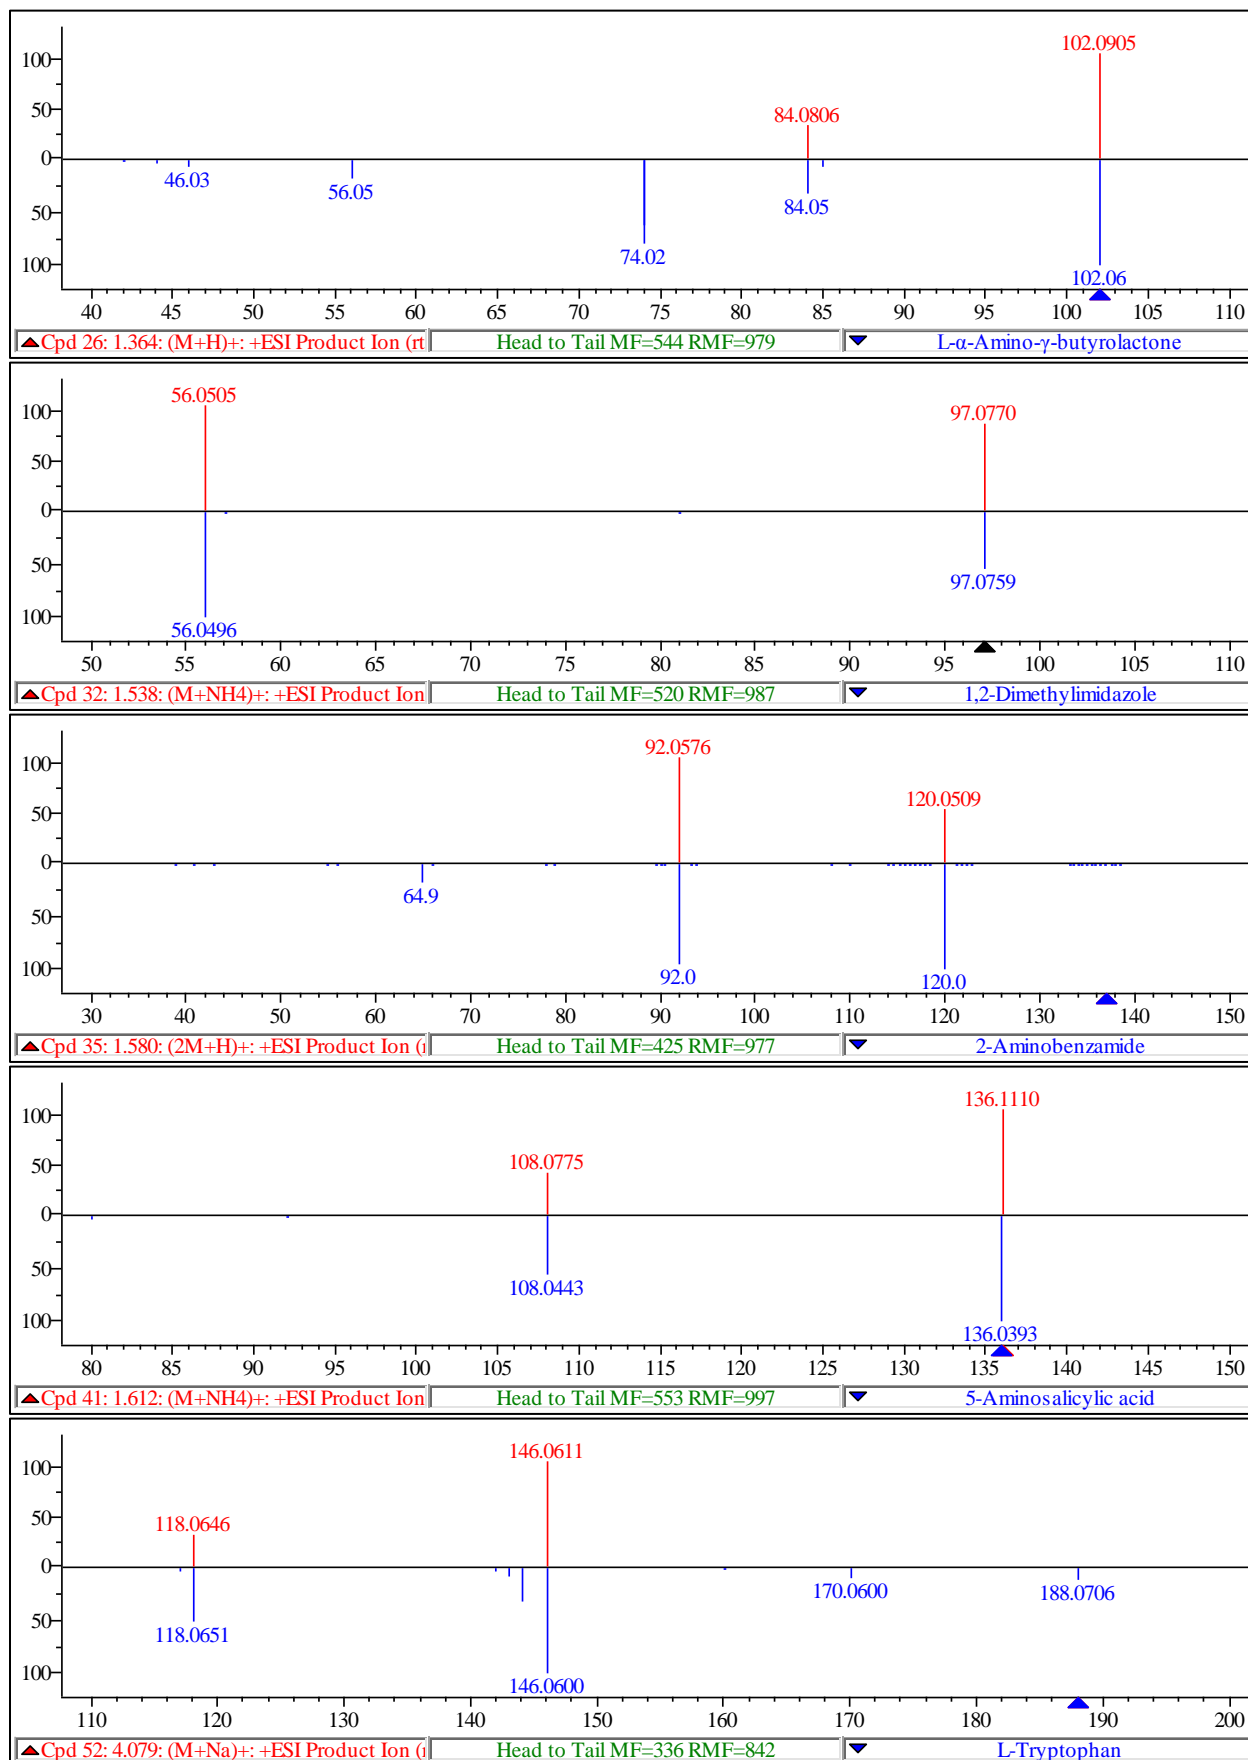

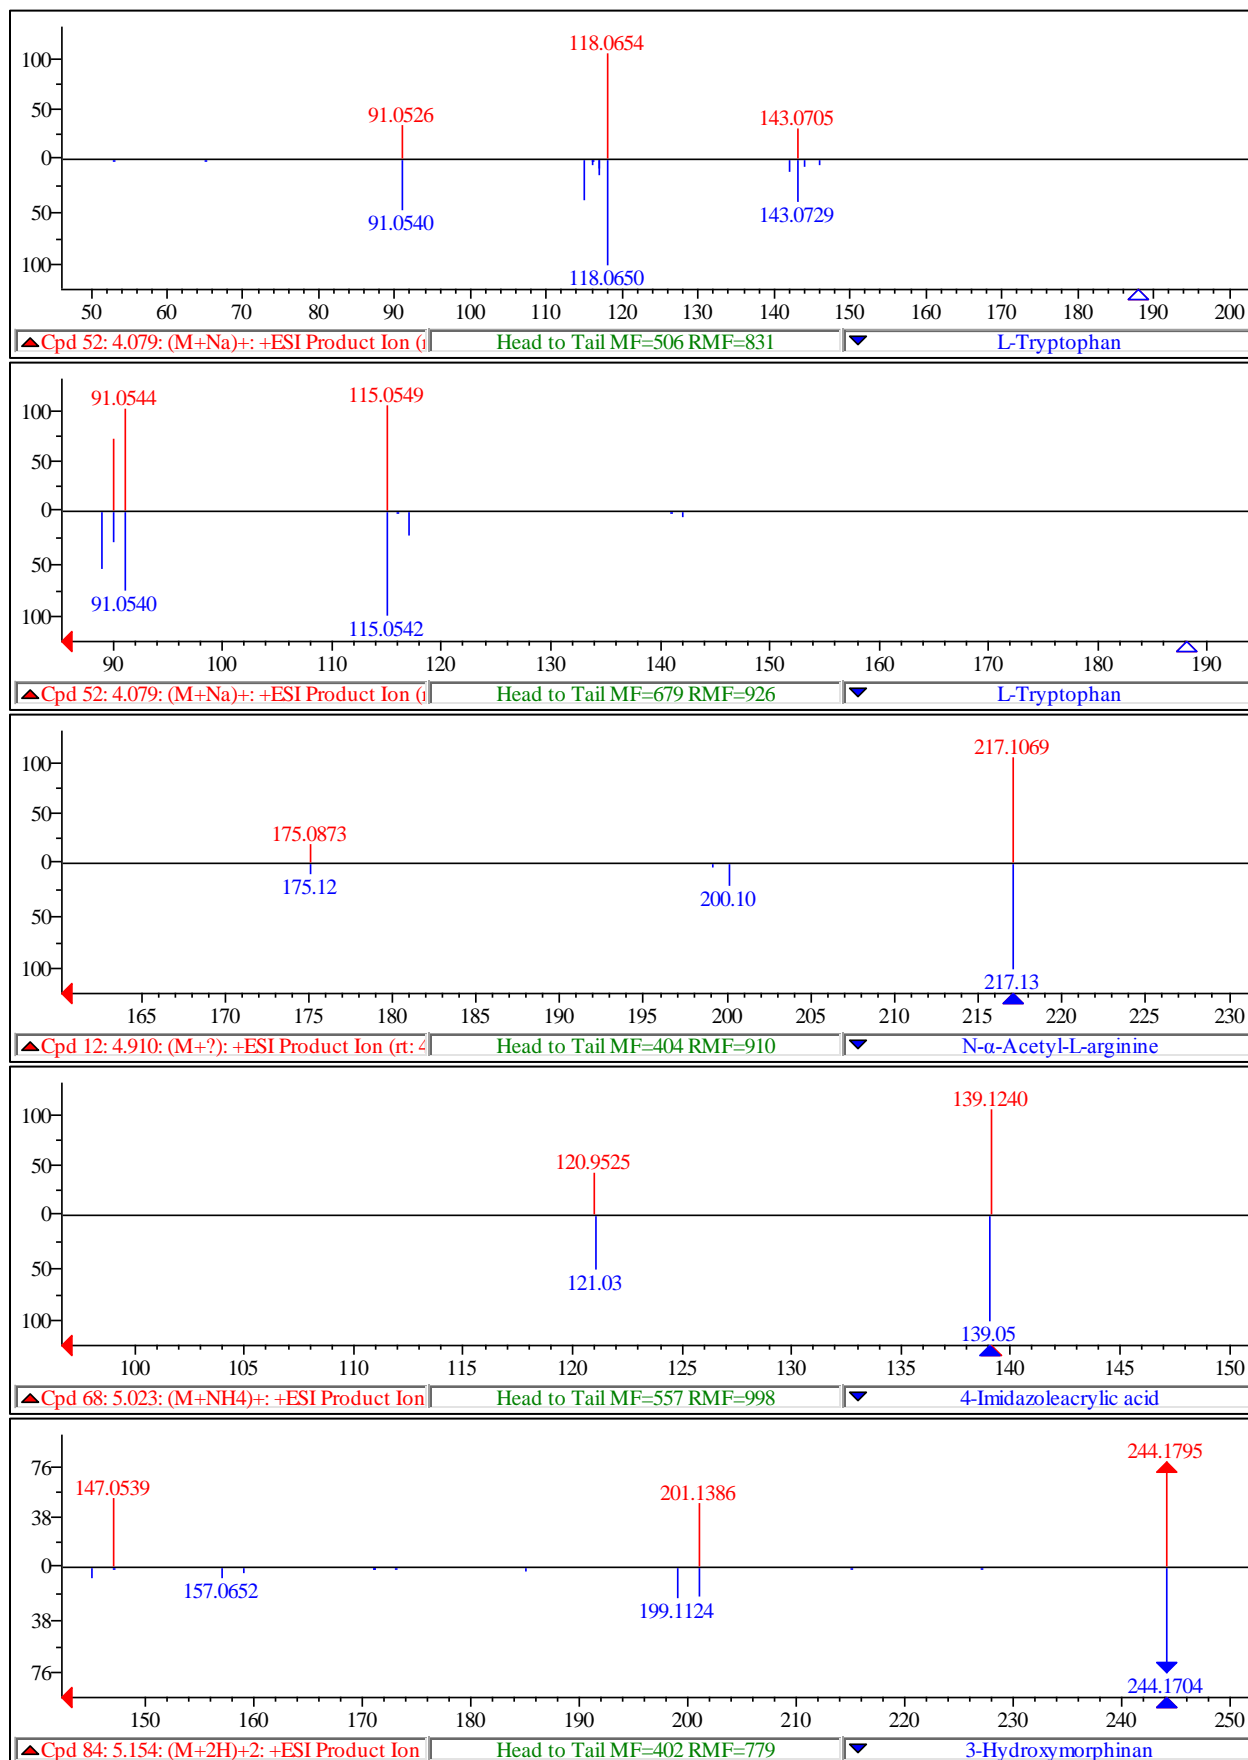

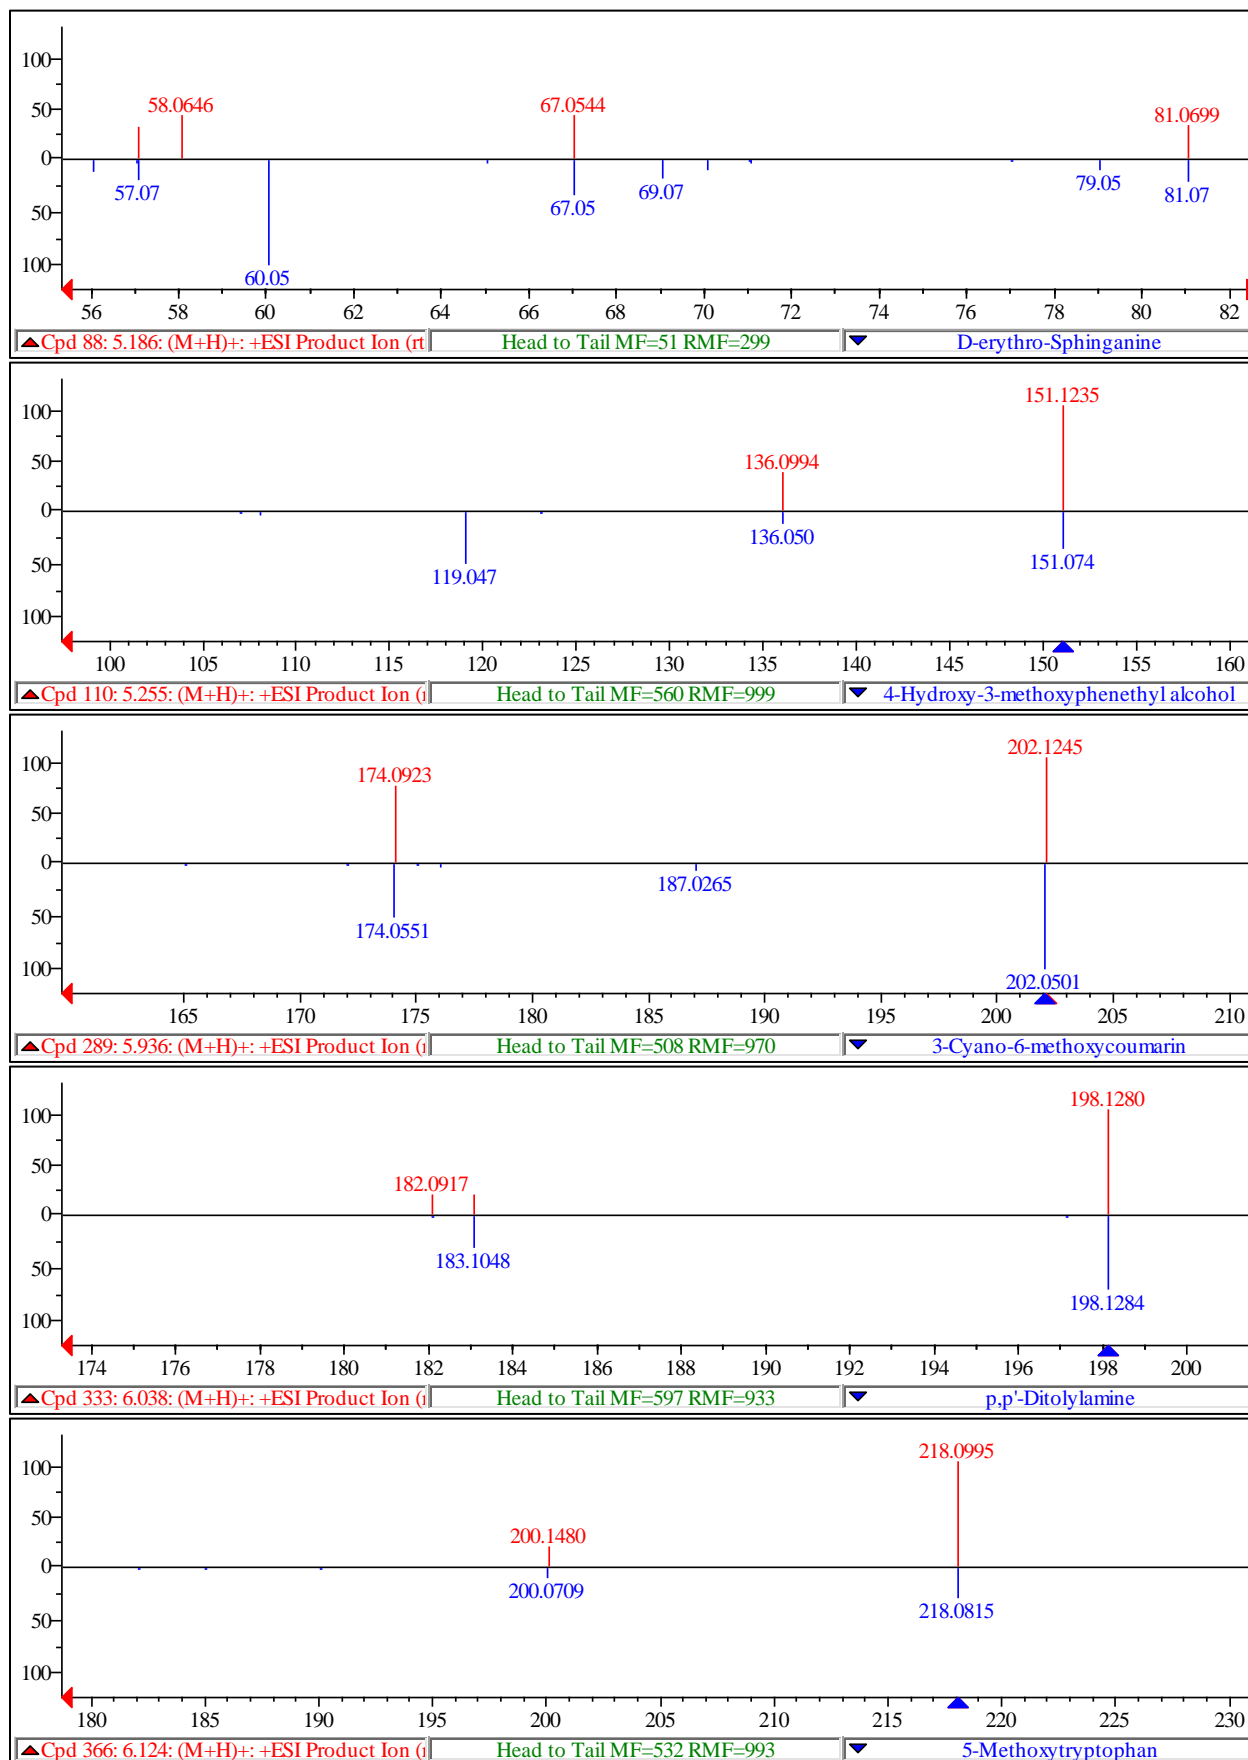

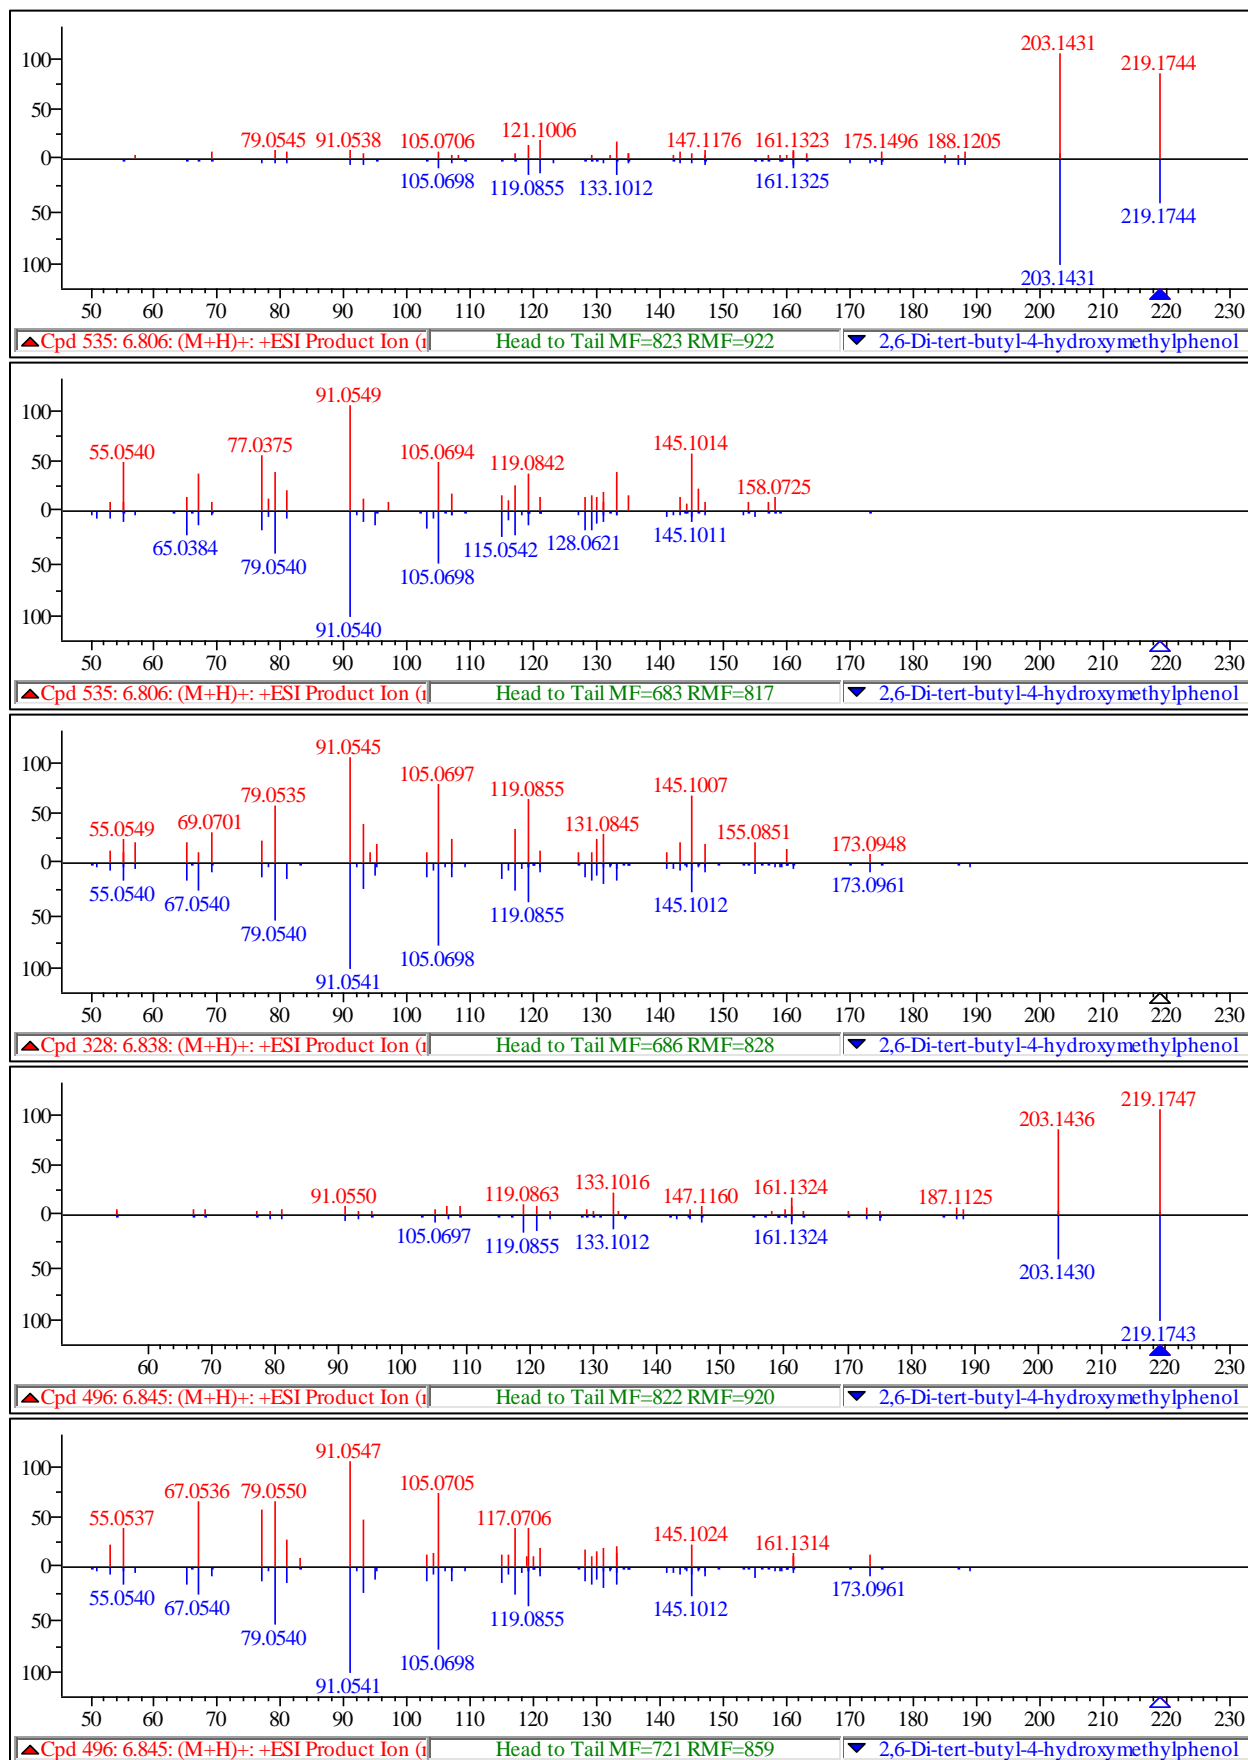

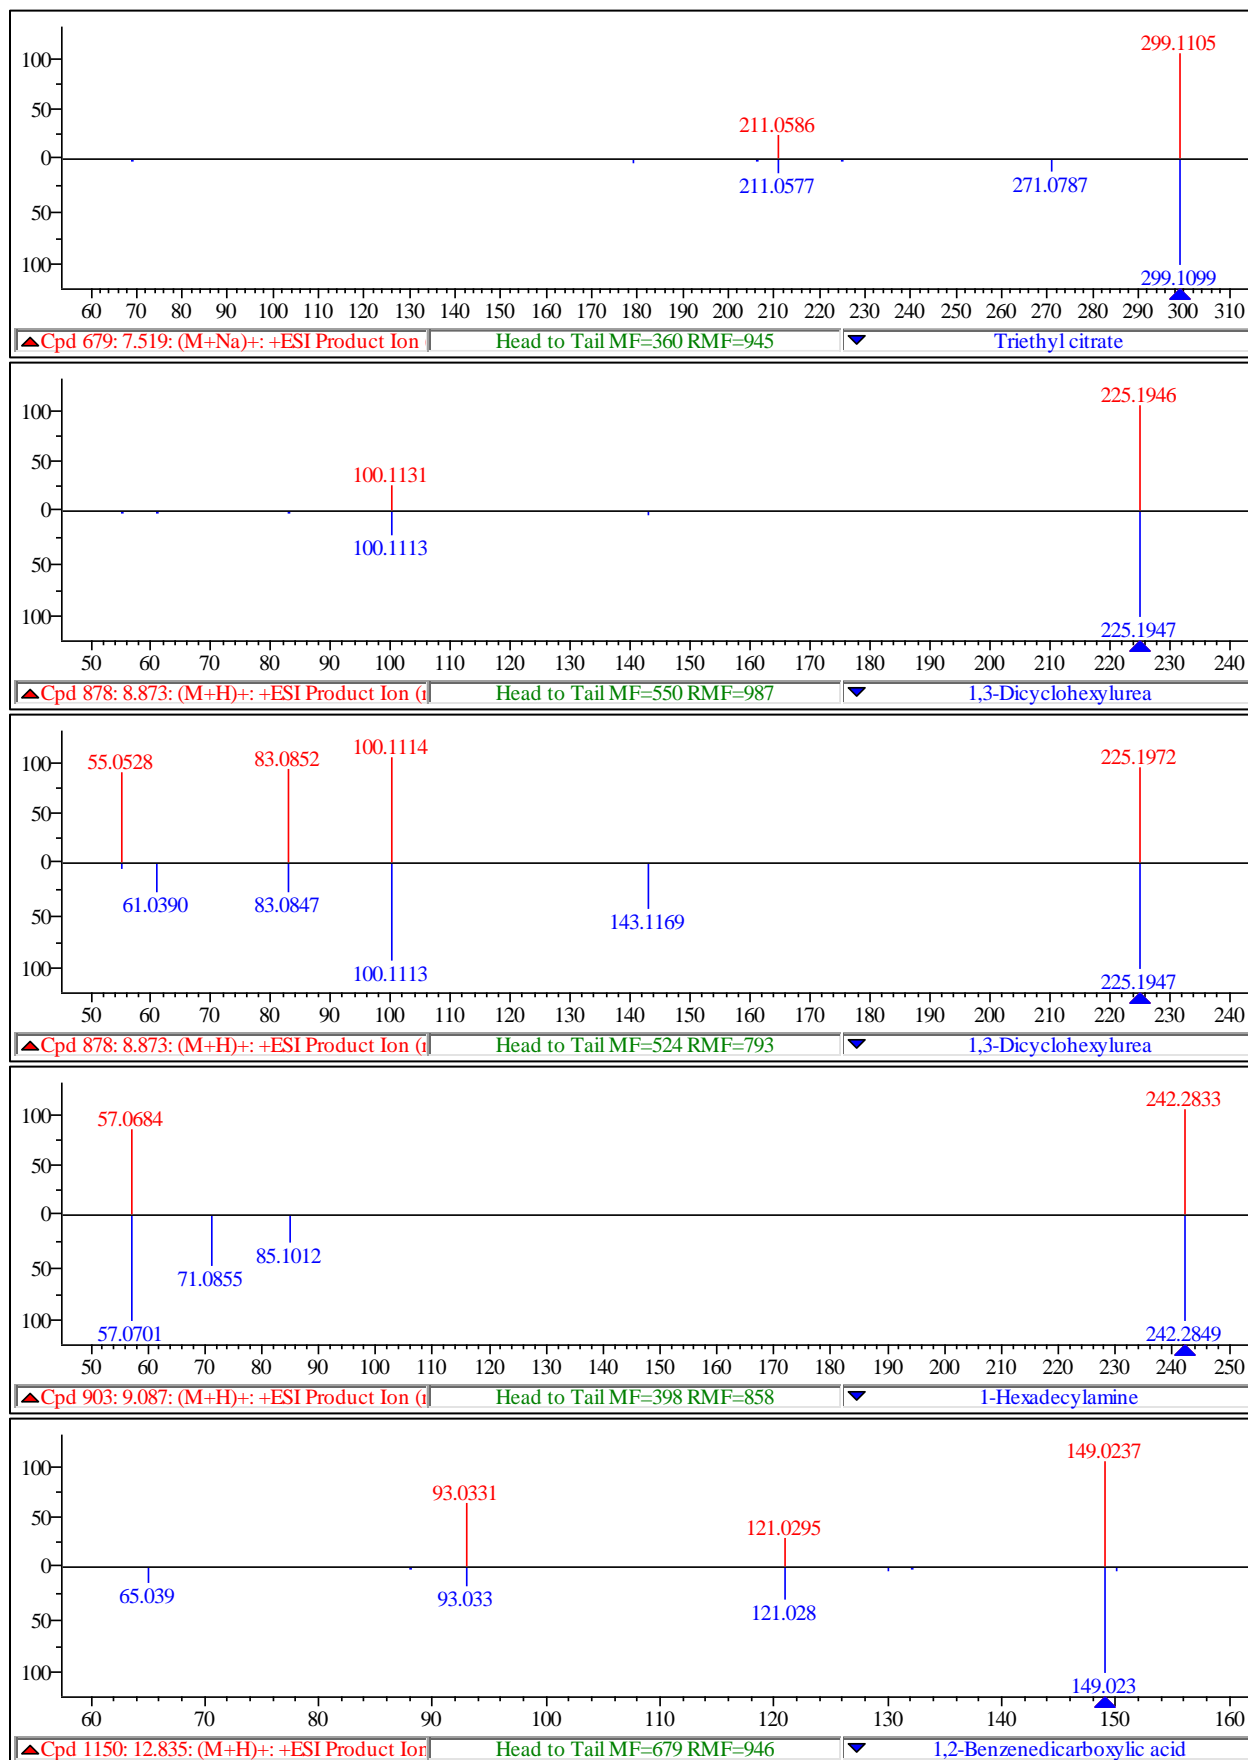

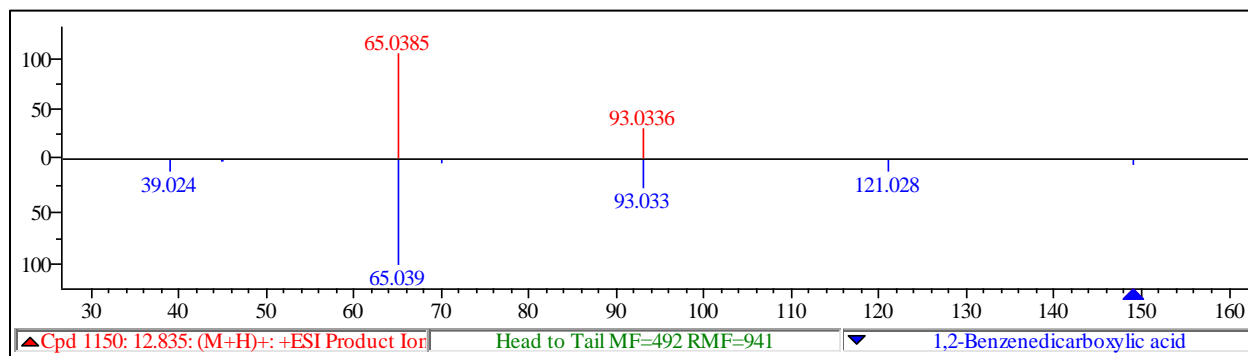

Supplement: MOESM7 [file 12217464]
