# Supplementary material for: Determining the presence of asthma-related molecules and salivary contamination in exhaled breath condensate
Source: Springer Nature journal article supplement (doi:10.1186/s12931-017-0538-5), 2017-04-12
Supplement: MOESM1 [file 12217464]

**Additional file 1: Targeted mass spectrometry parameters for eicosanoid analysis.** MRM parameters, retention times, associated internal standards, and ionization modes used for lipid mediators by LC/MS/MS. IS: internal standard.

| Compound            | MRM            | CE (V) | RT (min) | Internal standard | Ionization mode |
|---------------------|----------------|--------|----------|-------------------|-----------------|
| 8-iso-15R-PGF2a     | 353.2 -> 193.1 | 16     | 8.08     | 8-iso-PGF2a-d4    | Negative        |
| 8-iso-PGF2a         | 353.2 -> 193.1 | 16     | 8.23     | 8-iso-PGF2a-d4    | Negative        |
| 8-ISO-PGF2a-d4 (IS) | 357.2 -> 197.1 | 26     | 8.20     | NA                | Negative        |
| 11B-PGF2a           | 353.2 -> 193.1 | 16     | 8.43     | 8-iso-PGF2a-d4    | Negative        |
| PGE2                | 351.2 -> 315.2 | 8      | 9.02     | PGE2-d4           | Negative        |
| PGE2-d4 (IS)        | 355.2 -> 319.2 | 8      | 8.98     | NA                | Negative        |
| 15R-PGF2a           | 353.2 -> 309.2 | 16     | 9.03     | PGF2a-d9          | Negative        |
| PGF2a               | 353.2 -> 309.2 | 16     | 9.12     | PGF2a-d9          | Negative        |
| Resolvin D2-d5 (IS) | 380.2 -> 141.0 | 13     | 9.30     | NA                | Negative        |
| Resolvin D2         | 375.2 -> 141.0 | 13     | 9.35     | Resolvin D2-d5    | Negative        |
| Resolvin D1         | 375.2 -> 141.0 | 13     | 10.13    | Resolvin D2-d5    | Negative        |
| Lipoxin A4          | 351.2 -> 114.9 | 13     | 10.38    | Resolvin D2-d5    | Negative        |
| LTD4-d5 (IS)        | 500.3 -> 176.8 | 18     | 11.37    | NA                | Positive        |
| LTD4                | 495.3 -> 176.9 | 17     | 11.39    | LTD4-d5           | Positive        |
| 10(S),17(S)-DiHDoHE | 359.2 -> 153.0 | 13     | 12.95    | LTB4-d4           | Negative        |
| 7S Maresin-1        | 359.2 -> 341.2 | 9      | 12.95    | LTB4-d4           | Negative        |
| 7R Maresin-1        | 359.2 -> 250.0 | 17     | 13.02    | LTB4-d4           | Negative        |
| LTE4-d5             | 443.3 -> 338.2 | 18     | 13.06    | NA                | Positive        |
| LTE4                | 438.2 -> 333.1 | 17     | 13.09    | LTE4-d5           | Positive        |
| LTB4-d4             | 339.2 -> 197.1 | 13     | 13.47    | NA                | Negative        |
| LTB4                | 335.2 -> 195.1 | 13     | 13.53    | LTB4-d4           | Negative        |
| 17(S)-HDHA          | 343.2 -> 281.2 | 9      | 17.40    | 9(S)-HODE-d4      | Negative        |
| 14(S)-HDHA          | 343.2 -> 205.0 | 9      | 17.73    | 9(S)-HODE-d4      | Negative        |
