# Supplementary material for: Determining the presence of asthma-related molecules and salivary contamination in exhaled breath condensate
Source: Springer Nature journal article supplement (doi:10.1186/s12931-017-0538-5), 2017-04-12

**Additional file 5: Tandem MS fragmentation patterns for six EBC metabolites.** The mass spectral fragment peaks in red indicate the experimental results. The peaks in blue indicate the database matches based on standards.

Citric acid ( $C_6H_8O_7$ ), negative mode, RT = 1.693 minutes

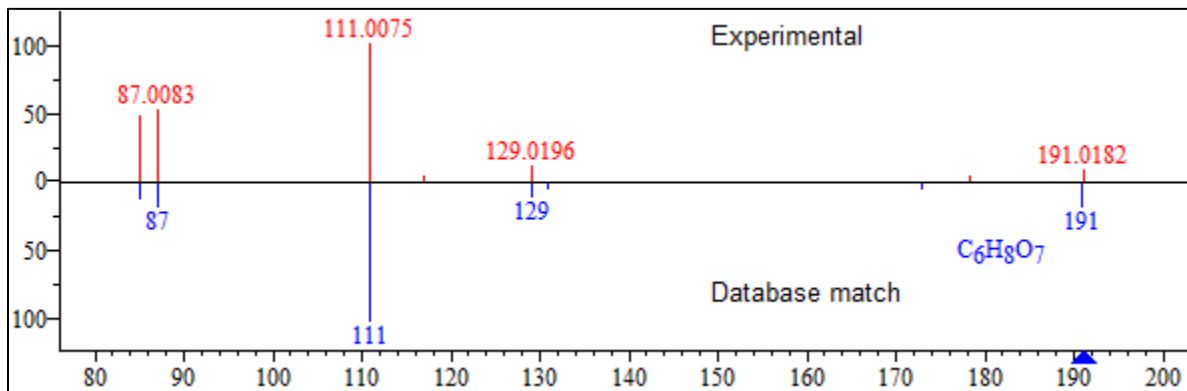

Succinic acid ( $C_4H_6O_4$ ), negative mode, RT = 1.830 minutes

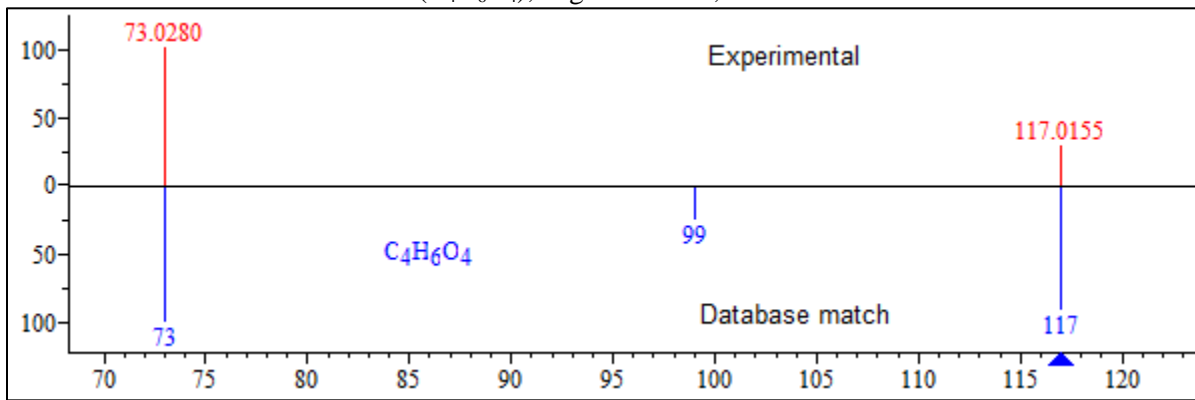

Acetylsalicylic acid ( $C_9H_8O_4$ ), negative mode, RT = 6.957 minutes

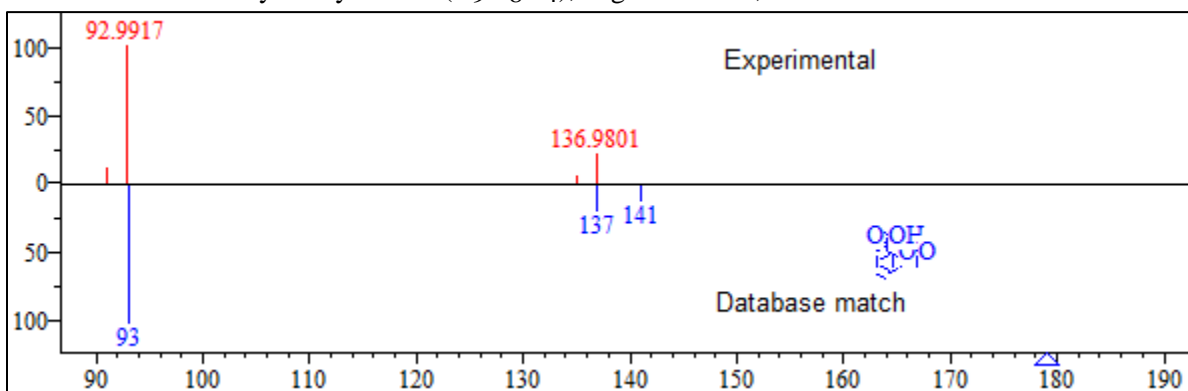

Shikimic acid ( $C_7H_{10}O_5$ ), negative mode, RT = 27.634 minutes

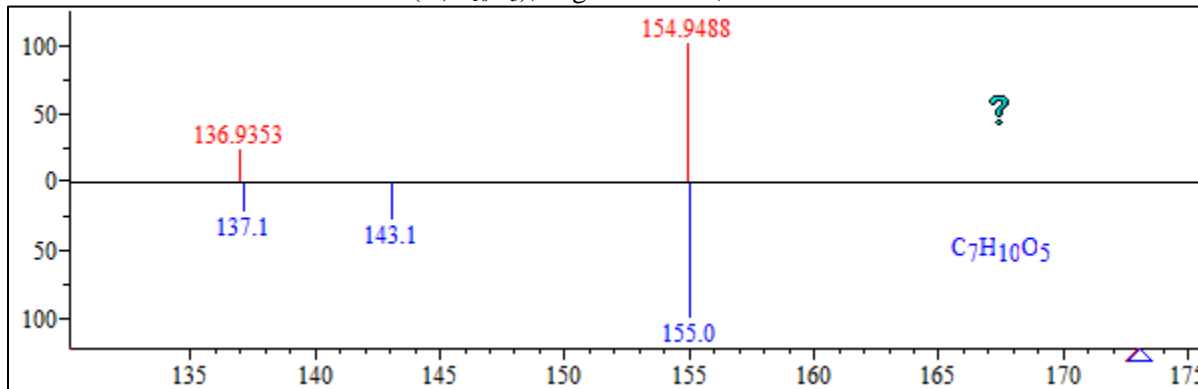

3,4-Furandicarboxylic acid (C<sub>6</sub>H<sub>4</sub>O<sub>5</sub>), negative mode, RT = 31.702 minutes

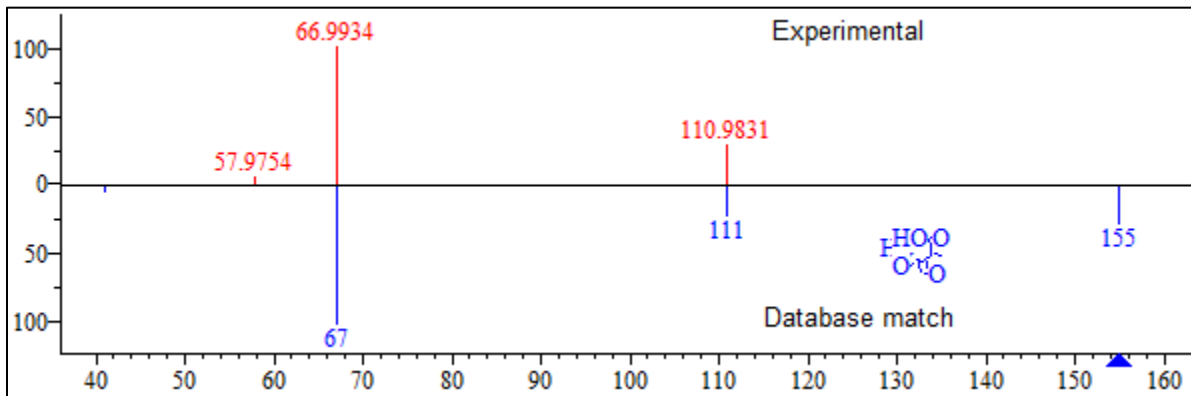

4-Chloro-L-phenylalanine (C<sub>9</sub>H<sub>10</sub>ClNO<sub>2</sub>), negative mode, RT = 31.518 minutes

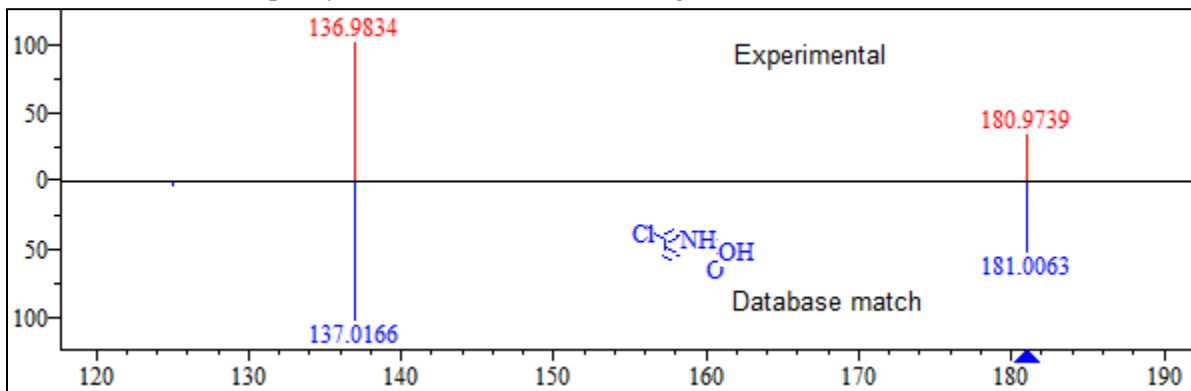

Supplement: MOESM5 [file 12217464]
