# Supplementary material for: Determining the presence of asthma-related molecules and salivary contamination in exhaled breath condensate
Source: Springer Nature journal article supplement (doi:10.1186/s12931-017-0538-5), 2017-04-12
Supplement: MOESM8 [file 12217464]

**Additional file 8: Targeted Eicosanoid Analysis of EBC.** EBC was collected from four groups of volunteers: healthy smokers, healthy non-smokers, non-smokers with nasal congestion, and non-smokers with the common cold. Samples were pooled, lyophilized, reconstituted in LC-MS buffer, and analyzed using targeted LC-MS on a triple quadrupole mass spectrometer.

| Compound Method                          |                          |                                          |            | Smoker             | Nasal Congestion   | Common Cold        | Healthy            |
|------------------------------------------|--------------------------|------------------------------------------|------------|--------------------|--------------------|--------------------|--------------------|
| Name                                     | Transition               | Associated pathway                       | Fatty acid | Final Conc (pg/ml) | Final Conc (pg/ml) | Final Conc (pg/ml) | Final Conc (pg/ml) |
| 11(12)-EET                               | 319.2 -> 178.8           | CYP450                                   | AA         | 0.0                | 0.0                | 0.0                | 0.0                |
| 11B-PGF2a                                | 353.2 -> 193.1           | Cyclooxygenase                           | AA         | <b>1144.0</b>      | 0.0                | 0.0                | 0.0                |
| 12S-HETE                                 | 319.2 -> 178.7           | 12-Lipoxygenase                          | AA         | 0.0                | 0.0                | 0.0                | 0.0                |
| 14(15)-EET                               | 319.2 -> 175.0           | CYP450                                   | AA         | 0.0                | 0.0                | 0.0                | 0.0                |
| 15R-PGF2a                                | 353.2 -> 309.2           | Cyclooxygenase                           | AA         | <b>2091.5</b>      | 0.0                | 0.0                | 0.0                |
| 15S-HETE                                 | 319.2 -> 219.1           | 15-Lipoxygenase                          | AA         | 0.0                | 0.0                | 0.0                | 0.0                |
| 5S-HETE                                  | 319.2 -> 115.0           | 5-Lipoxygenase                           | AA         | 0.0                | 0.0                | 0.0                | 0.0                |
| 6-a-Prostaglandin (PGI2 analog)          | 353.2 -> 129.0           | Cyclooxygenase                           | AA         | 0.0                | 0.0                | 0.0                | 0.0                |
| 8(9)-EET                                 | 319.2 -> 301.1           | CYP450                                   | AA         | 0.0                | 0.0                | 0.0                | 0.0                |
| 8-iso-15R-PGF2a                          | 353.2 -> 193.1           | Lipid peroxidation/oxidative stress      | AA         | <b>2383.2</b>      | 0.0                | 0.0                | 0.0                |
| 8-iso-PGF2a                              | 353.2 -> 193.1           | Lipid peroxidation/oxidative stress      | AA         | <b>1635.4</b>      | 0.0                | 0.0                | 0.0                |
| 8S-HETE                                  | 319.2 -> 154.9           | 8-hydroxylation                          | AA         | 0.0                | 0.0                | 0.0                | 0.0                |
| Carbocyclic Thromboxane A2 (TXA2 analog) | 347.3 -> 247.0           | Cyclooxygenase                           | AA         | <b>40.1</b>        | 0.0                | 0.0                | 0.0                |
| Lipoxin A4 (LXA4)                        | 351.2 -> 114.9           | 5-Lipoxygenase                           | AA         | <b>100.8</b>       | 0.0                | 0.0                | 0.0                |
| LTB4                                     | 335.2 -> 195.1           | 5-Lipoxygenase                           | AA         | <b>136.4</b>       | 0.0                | 0.0                | 0.0                |
| LTD4_NEG                                 | 495.3 -> 176.9           | 5-Lipoxygenase/Glutathione-S-transferase | AA         | 0.0                | 0.0                | 0.0                | 0.0                |
| LTE4_NEG                                 | 438.2 -> 333.1           | 5-Lipoxygenase/Glutathione-S-transferase | AA         | <b>29.9</b>        | 0.0                | 0.0                | 0.0                |
| PGE2                                     | 351.2 -> 315.2           | Cyclooxygenase                           | AA         | <b>963.2</b>       | 0.0                | 0.0                | 0.0                |
| PGF2a                                    | 353.2 -> 309.2           | Cyclooxygenase                           | AA         | <b>1296.3</b>      | 0.0                | 0.0                | 0.0                |
| Prostaglandin D2                         | 351.2 -> 315.3           | Cyclooxygenase                           | AA         | <b>106.4</b>       | 0.0                | 0.0                | 0.0                |
| TXB2                                     | 369.2 -> 168.9           | Cyclooxygenase                           | AA         | <b>792.6</b>       | 0.0                | 0.0                | 0.0                |
| 10(S),17(S)-DiHDoHE (Protectin DX)       | 359.2 -> 153.0           | 8-hydroxylation                          | DHA        | <b>96.6</b>        | 0.0                | 0.0                | 0.0                |
| 14(S)-HDHA                               | 343.2 -> 205.0           | 12-Lipoxygenase                          | DHA        | <b>67.3</b>        | 0.0                | 0.0                | 0.0                |
| 17(S)-HDHA                               | 343.2 -> 281.2           | 15-Lipoxygenase                          | DHA        | <b>57.6</b>        | 0.0                | 0.0                | 0.0                |
| 7R Maresin-1                             | 359.2 -> 250.0           | 12-Lipoxygenase                          | DHA        | <b>100.5</b>       |                    |                    | 0.0                |
| 7S Maresin-1                             | 359.2 -> 341.2           | 12-Lipoxygenase                          | DHA        | <b>164.2</b>       | 0.0                | 0.0                | 0.0                |
| Resolvin D1 (RVD1)                       | 375.2 -> 141.0           | 12-Lipoxygenase                          | DHA        | <b>112.9</b>       | 0.0                | 0.0                | 0.0                |
| Resolvin D2 (RVD2)                       | 375.2 -> 141.0           | 12-Lipoxygenase                          | DHA        | <b>74.8</b>        | 0.0                | 0.0                | 0.0                |
| <b>13-HODE</b>                           | <b>295.2 -&gt; 277.1</b> | <b>15-Lipoxygenase</b>                   | <b>LA</b>  | <b>566.5</b>       | <b>561.1</b>       | <b>79.8</b>        | <b>166.5</b>       |
| <b>13-OxoODE</b>                         | <b>293.2 -&gt; 113.0</b> | <b>15-Lipoxygenase</b>                   | <b>LA</b>  | <b>129.7</b>       | <b>135.6</b>       | <b>91.0</b>        | <b>105.9</b>       |
| <b>9-HODE</b>                            | <b>295.2 -&gt; 277.0</b> | <b>12-Lipoxygenase</b>                   | <b>LA</b>  | <b>586.6</b>       | <b>702.8</b>       | <b>218.1</b>       | <b>119.3</b>       |
| <b>9-OxoODE</b>                          | <b>293.2 -&gt; 185.0</b> | <b>12-Lipoxygenase</b>                   | <b>LA</b>  | <b>267.3</b>       | <b>410.8</b>       | <b>131.7</b>       | <b>64.4</b>        |

AA = Arachidonic acid

DHA = Docosahexaenoic acid

LA = Linoleic acid
